1 **TITLE:** A competence-regulated toxin-antitoxin system in *Haemophilus influenzae*

2 **RUNNING TITLE:** A competence-regulated toxin-antitoxin system

3 **AUTHORS:** Hailey Findlay Black <sup>1</sup>, Scott Mastromatteo<sup>1</sup>, Sunita Sinha <sup>2</sup>, Rachel L. Ehrlich <sup>3</sup>, Corey Nislow <sup>4</sup>, Joshua  
4 Chang Mell <sup>3</sup>, Rosemary J. Redfield <sup>1\*</sup>

5 \* Corresponding author: [redfield@zoology.ubc.ca](mailto:redfield@zoology.ubc.ca), (778) 960-4950

6

7 **AUTHOR AFFILIATIONS:**

8 1 Department of Zoology, University of British Columbia, Vancouver BC, Canada

9 2 Sequencing + Bioinformatics Consortium, Office of the Vice-President, University of British Columbia, Vancouver  
10 BC, Canada

11 3 Department of Microbiology & Immunology, Center for Genomic Sciences, Drexel University College of Medicine,  
12 Philadelphia PA, USA

13 4 Department of Pharmaceutical Sciences, University of British Columbia, Vancouver BC, Canada

14

15 **AUTHOR CONTRIBUTIONS:**

16 - Performed the experiments: HFB, SM, SS, RJR

17 - Carried out the analyses: HFB, SM, SS, RLE, JCM, RJR

18 - Wrote the paper: HFB, SM, JCM, RJR

19 - Contributed reagents and supplies: CN, RJR

20

21 **ABBREVIATED SUMMARY:**

22 The competence regulon of *Haemophilus influenzae* includes a toxin/antitoxin gene pair. The toxin completely  
23 prevents DNA uptake when not opposed by antitoxin, without obviously compromising cell growth or viability. The  
24 TA gene pair was acquired by horizontal gene transfer, and the toxin gene has undergone repeated deletions.

25

26

27 **ABSTRACT**

28 Natural competence allows bacteria to respond to environmental and nutritional cues by taking up free  
29 DNA from their surroundings, thus gaining nutrients and genetic information. In the Gram-negative  
30 bacterium *Haemophilus influenzae*, the DNA uptake machinery is induced by the CRP and Sxy transcription  
31 factors in response to lack of preferred carbon sources and nucleotide precursors. Here we show that  
32 *H10659*—which is absolutely required for DNA uptake— encodes the antitoxin of a competence-regulated  
33 toxin-antitoxin operon ('*toxTA*'), likely acquired by horizontal gene transfer from a *Streptococcus* species.  
34 Deletion of the toxin restores uptake to the antitoxin mutant. In addition to the expected Sxy- and CRP-  
35 dependent-competence promoter, transcript analysis using RNA-seq identified an internal antitoxin-  
36 repressed promoter whose transcription starts within *toxT* and will yield nonfunctional protein. We present  
37 evidence that the most likely effect of unopposed toxin expression is non-specific cleavage of mRNAs and  
38 arrest or death of competent cells in the culture, and we show that the toxin gene has been inactivated by  
39 deletion in many *H. influenzae* strains. We suggest that this competence-regulated toxin-antitoxin system  
40 may facilitate downregulation of protein synthesis and recycling of nucleotides under starvation conditions,  
41 or alternatively be a simple genetic parasite.

42

43

## 44 INTRODUCTION

45 Toxin-antitoxin systems are bacterial gene pairs that were originally discovered on plasmids, where they function to  
46 promote plasmid persistence by killing any daughter cells that have not inherited the plasmid. Typically, one gene of  
47 the pair encodes a relatively stable toxic protein that blocks cell growth, and the other encodes a labile antitoxin  
48 (RNA or protein) that blocks the toxin's activity and regulates its expression (Yamaguchi *et al.*, 2011, Goeders and Van  
49 Melderer, 2014). Similar toxin-antitoxin gene pairs have been discovered on many bacterial chromosomes, where  
50 they are thought to be relatively recent introductions that in some cases have been co-opted to regulate cellular  
51 functions (Van Melderer and Saavedra de Bast, 2009). Here we describe one such system, which is induced in  
52 naturally competent cells and whose unopposed toxin completely prevents DNA uptake and transformation.

53 Many bacteria are naturally competent, able to take up DNA from their surroundings and—when sequence similarity  
54 allows—recombine it into their genomes (Ambur *et al.*, 2016, Johnston *et al.*, 2014, Mell and Redfield, 2014). In most  
55 species, this DNA uptake is tightly controlled, with protein machinery specified by a set of co-regulated chromosomal  
56 genes induced in response to diverse cellular signals. In addition to components of the DNA-uptake machinery,  
57 competence-regulon genes encode proteins that translocate DNA across the inner membrane, proteins that facilitate  
58 recombination, and proteins of unknown function. *Haemophilus influenzae* has an unusually small and well-defined  
59 competence regulon (26 genes in 13 operons) induced by signals of energy and nucleotide scarcity (Redfield *et al.*,  
60 2005, Sinha *et al.*, 2012). Induction of these genes begins in response to depletion of phosphotransferase sugars,  
61 when rising levels of cyclic AMP (cAMP) first stimulate transcription of genes regulated by the transcriptional  
62 activator CRP. One of these induced genes encodes the competence-specific transcriptional activator Sxy, but  
63 efficient translation of *sxy* mRNA occurs only when purine pools are also sufficiently depleted (Macfadyen *et al.*,  
64 2001; Sinha *et al.*, 2013). Sxy then acts with CRP at the promoters of competence genes, stimulating their expression  
65 and leading to DNA uptake and natural transformation. These competence promoters are distinguished by the  
66 presence of 'CRP-S' sites (formerly called CRE sites), variants of standard CRP sites that depend on both CRP and Sxy  
67 for activation (Cameron and Redfield, 2006).

**Findlay-Black *et al.* A competence-regulated toxin-antitoxin system**

68 All but one of the fifteen *H. influenzae* genes needed for DNA uptake encode typical competence proteins—  
69 membrane-associated proteins homologous to known components of the Type IV pilus-based DNA uptake machinery  
70 present in nearly all known naturally competent species (Johnston *et al.*, 2014). The one exception is *HIO659*, which  
71 instead encodes a 98 amino acid cytoplasmic protein with no similarity to known DNA uptake proteins. It shares a  
72 competence-inducible CRP-S promoter with an upstream gene encoding another short cytoplasmic protein (*HIO660*,  
73 119 aa) (**Fig. 1, top**). Although a knockout of *HIO659* eliminates detectable DNA uptake and transformation, a  
74 knockout of *HIO660* has no effect (Sinha *et al.* 2012).

75 Here we show that *HIO660* and *HIO659* comprise a horizontally transferred operon that encodes a toxin-antitoxin  
76 pair, and that expression of the toxin in the absence of the antitoxin completely prevents DNA uptake and  
77 transformation. Surprisingly, this unopposed toxin expression has only slight effects on induction of competence  
78 genes, and on cell growth and viability. The *HIO660* toxin is unusual in that its overexpression in the absence of  
79 *HIO659* is not lethal to cells growing in rich medium, which may be explained by our observation that transcription in  
80 the absence of *HIO659* occurs mainly from a second internal promoter that would not produce functional protein.

81 **RESULTS**

82 ***HIO659* and *HIO660* act as a toxin-antitoxin system.** Our original analyses of competence-induced genes did not  
83 identify any close homologs of *HIO659* or *HIO660* (Redfield *et al.* 2005, Sinha *et al.* 2012). However recent database  
84 searches and examination of BLAST results revealed that these genes' products resemble proteins in the Type II  
85 toxin/antitoxin families, which typically occur in similar two-gene operons. If *HIO660* and *HIO659* do encode a toxin-  
86 antitoxin pair, then  $\Delta HIO659$ 's DNA uptake defect would likely be caused by unopposed expression of a *HIO660*-  
87 encoded toxin protein that prevents DNA uptake, so knocking out this toxin gene should restore competence to the  
88 *HIO659* (antitoxin) mutant. We tested this by constructing an *HIO660/HIO659* double mutant (Fig. 1) and examining  
89 its ability to be transformed with antibiotic-resistant chromosomal DNA. The double mutant had normal  
90 transformation (**Fig. 2**), showing that mutation of *HIO660* suppresses the competence defect of an *HIO659* mutant,  
91 and also that neither *HIO660* nor *HIO659* is directly needed for the development of competence. This supported the

**Findlay-Black *et al.*                      A competence-regulated toxin-antitoxin system**

92 postulated antitoxin function of *H10660*, so we named the *H10660* and *H10659* genes *toxT* (toxin) and *toxA* (antitoxin)  
93 respectively.

94 **ToxT does not modulate growth and/or competence development in normal cells:** The ToxT protein must have a  
95 strong effect on competent cells, since earlier work found that a *toxA* knockout strain had no detectable DNA uptake  
96 or transformation under standard competence-inducing conditions (Sinha *et al.* 2012, see also **Fig. 2**). DNA uptake by  
97 the *toxA* mutant was below the limit of detection (100-fold reduction), but the  $>10^6$ -fold reduction in transformation  
98 frequency provided a more sensitive measure of the magnitude of the defect. A simple explanation for this  
99 phenotype would be that unopposed ToxT prevents competence by killing or otherwise inactivating the cells in which  
100 it is expressed; however, growth rates were very similar between wildtype and the three *toxTA* mutant strains  
101 growing in rich medium (**Supp. Fig. A**). However, because the *toxTA* promoter is regulated by a CRP-S site, its  
102 expression (and thus ToxT production) might be limited to competent cells even in the absence of ToxA. This  
103 prompted us to look for evidence of competence-dependent toxicity. Cells with and without *toxA* had similar CFU/ml  
104 values in standard transformation assays, but this is not a very sensitive test of competence-dependent toxicity since  
105 cells in the competence-inducing starvation medium MIV are already growth-arrested. Furthermore, only 10%-50%  
106 of cells in a competent culture are typically transformable (Mell *et al.*, 2014), and the extent of competence gene  
107 expression in the non-transformable fraction is not known.

108 A more detailed time course analysis compared wildtype and  $\Delta toxA$  mutant cell numbers (CFU/ml; **Fig. 3**) and culture  
109 densities ( $OD_{600}$ ; **Supp. Fig. B**) during growth in rich medium, during the development of competence, and during  
110 recovery from MIV starvation medium in rich medium.  $\Delta toxA$  cells grew slightly slower than wildtype during the  
111 initial log phase growth in rich medium. In both cultures, transfer to the starvation medium MIV slowed growth to  
112 the same extent (both OD and in CFU/ml) (grey-shaded area in both figures). If unopposed toxin expression during  
113 competence development kills cells or halts growth, then returning cells to rich medium might reveal a stronger  
114 growth defect. However, both strains also had similar recovery kinetics after a fraction of their culture was returned  
115 to rich medium, although  $\Delta toxA$  cells again grew slightly slower than wildtype.

**Findlay-Black *et al.* A competence-regulated toxin-antitoxin system**

116 Since cyclic AMP is required for induction of the competence genes, and addition of cAMP induces partial  
117 competence during exponential growth (Dorocicz *et al.*, 1993), we also tested the effect of cAMP on the  $\Delta toxA$   
118 knockout. Addition of cAMP did not rescue its transformation defect (Supp. Fig. C), so failure to transform is not  
119 caused by defective cAMP production in the antitoxin mutant.

120 Because chromosomal toxin-antitoxin systems are often reported to have acquired roles in modulating cell growth  
121 (Page and Peti, 2016), we examined the  $\Delta toxT$  mutant for changes in growth and competence under various  
122 conditions. The grey line in Supplementary Fig. A shows that  $\Delta toxT$ 's growth is indistinguishable from that of  
123 wildtype cells (blue line), and Fig. 2 shows that its MIV-induced competence is also unchanged. Supp. Fig. D shows  
124 that the kinetics of competence development and loss during growth in rich medium is also indistinguishable from  
125 wildtype. Also unchanged is the gradual loss of competence when cells are left overnight in MIV medium (not  
126 shown). We conclude that  $ToxT$ 's normal expression in wildtype cells does not detectably regulate competence  
127 development or loss. Since these phenotypic analyses did not show direct evidence of MIV-specific toxicity, we used  
128 RNA-seq to investigate how a  $toxT$  deletion affects expression of  $toxT$  and  $toxT$ , and how these changes affect cells.

129 **Transcriptional control of competence:** The  $toxTA$  operon has a typical CRP-S-type regulatory motif upstream of the  
130  $toxT$  coding sequence, and previous global analysis of transcription using microarrays (Redfield *et al.*, 2005) showed  
131 that it is competence-induced. We have now investigated this regulation in more detail as part of a comprehensive  
132 RNA-seq analysis of competence-associated gene expression in wildtype and mutant cells. In these experiments,  
133 samples for RNA preparations were taken from three replicate cultures at four time points, first when cells were  
134 growing in log phase in the rich medium sBHI (t=0), and then at 10, 30 and 100 minutes after each culture had been  
135 transferred to the competence-inducing starvation medium MIV.

136 We first examined how competence induction changed expression of known CRP-regulated (CRP-N) and CRP+Sxy-  
137 regulated (CRP-S) genes. Fig. 4 gives an overview of the results. Each coloured dot represents a gene, colour-coded  
138 by function. Its horizontal position indicates its level of expression in rich medium (T=0) and its vertical position  
139 indicates how this expression changed at later time points (**A**: T=10; **B**: T=30; **C**: T=100) or in a mutant background at

**Findlay-Black *et al.***                      **A competence-regulated toxin-antitoxin system**

140 T=30 vs. T=0 (**D**;  $\Delta crp$ ; **E**:  $\Delta sxy$ ). Thus in Fig. 4A the higher positions of the green dots (genes regulated by CRP-N sites)  
141 and the red diamond (the competence regulator *sxy*) indicate that they were strongly induced after 10 min in MIV.  
142 Induction of *sxy* was followed (T=30 and T=100) by strong induction of the known competence-regulon genes (higher  
143 positions of CRP-S genes; blue dots) (Fig. 4B and C). Consistent with prior studies (Redfield *et al.*, 2005), induction of  
144 all these genes was blocked by deletion of the *crp* gene (Fig. 4D), and induction of the competence regulon (CRP-S)  
145 genes was blocked by deletion of *sxy* (Fig. 4E).

146 To identify all genes whose wildtype expression differed between sBHI and MIV, DESeq2 was used to compare RNA-  
147 seq expression values in wild-type RNA samples before and after competence induction (T=0 and T=30). Of the 1747  
148 genes examined, 325 had significantly different expression (adjusted p-value < 0.05 after performing a Wald test and  
149 Benjamini-Hoschberg correction in DESeq2). To focus on genes with large changes in expression, we imposed an  
150 additional requirement that expression be changed by at least 4-fold, the same threshold used in the previous  
151 microarray study (Redfield *et al.*, 2005). This higher stringency gave 123 genes significantly decreased and 71  
152 significantly increased, for a total of 194/1747 or 11% of all genes tested (listed in Supp. Table 2). Of these, 130 were  
153 among the 192 genes previously identified as differentially expressed in the microarray study.

154 Many of these changes are likely due to the absence of many essential nutrients from MIV medium. The significant  
155 induction of 9 of the 10 genes regulated by PurR is expected, since MIV lacks nucleotide precursors; the tenth PurR-  
156 regulated gene, HI1616, was also strongly induced in all replicates. MIV also lacks tryptophan, and all 11 Trp-regulon  
157 genes regulated by TrpR were significantly induced. The nutritional downshift is also likely to be responsible for the  
158 induction of many permeases and transporters, and for the significant downregulation of 39 of the 51 genes  
159 encoding ribosomal proteins (*rps* and *rpl* genes). The other 22 ribosomal protein genes were also downregulated,  
160 the majority with adjusted p-values < 0.05. Expression of 16S and 23S rRNAs was not measured since these  
161 molecules had been depleted from the samples during sequencing library preparation, but expression of the tRNA<sup>Ala</sup>,  
162 tRNA<sup>Leu</sup>, and tRNA<sup>Gly</sup> genes encoded within the six rRNA operons was also significantly reduced.

**Findlay-Black *et al.* A competence-regulated toxin-antitoxin system**

163 To clarify the roles of competence-regulating genes in the observed MIV-induced gene expression changes, RNA-seq  
164 coverage values from *sxy* and *crp* knockout strains were compared to values for KW20 sampled at the same four sBHI  
165 and MIV timepoints. To evaluate changes at all timepoints simultaneously, a likelihood ratio test was performed  
166 using DESeq2 to identify genes that behaved differently between strains. Significant genes were flagged after  
167 adjusting for multiple hypothesis testing. *Sxy* is the competence-specific regulator, and deleting it significantly  
168 reduced expression of 24 of the known competence genes (Redfield *et al.* 2005, Sinha *et al.*, 2013). Two other  
169 previously identified competence genes, HI0250 (*ssb*) and HI1631, also had reduced expression, but these did meet  
170 the significance cutoff. *ssb* is an essential gene (Sinha *et al.*, 2012); its high baseline expression increased 40% on  
171 transfer to MIV and returned to normal in the *sxy* knockout. Expression of HI1631 was reduced 6-fold by the *sxy*  
172 knockout, but high variability in KW20 expression led to an insignificant adjusted P-value.

173 **Transcriptional control of *toxTA*:** RNA-seq analysis confirmed that *toxTA* is regulated as a typical competence  
174 operon. In wildtype cells, baseline RNA-seq expression of *toxT* and *toxA* was very low during log phase in rich  
175 medium, with approximately tenfold induction by incubation in MIV (Fig. 5 (*toxT*) and Supp. Fig. E (*toxA*), green lines  
176 and points). As expected, this increase was eliminated by knockouts of CRP and *Sxy* (brown and blue lines and  
177 points). Like other CRP-S genes, both *toxT* and *toxA* were also induced in rich medium in the presence of mutations  
178 known to cause hypercompetence (Redfield 2005) (RNA-seq data not shown). Thus the *toxTA* operon is regulated as  
179 a typical member of the competence regulon.

180 RNA-seq analysis also showed that the *toxTA* operon is regulated as a typical type II toxin-antitoxin operon. In such  
181 operons, the antitoxin protein usually protects cells from the toxin in two ways. First, it inactivates the toxin protein  
182 by forming a complex with it that has no toxin activity. Second, this toxin-antitoxin complex binds to the *toxTA*  
183 promoter and represses transcription (Overgaard, 2008, Goeders and Van Melder, 2014). *ToxA* has a HTH-XRE  
184 DNA-binding domain, which is commonly found in promoter-binding antitoxins (Makarova *et al.*, 2009, Yamaguchi *et*  
185 *al.*, 2011), and the RNA-seq analysis in Fig. 5 confirmed that it represses *toxTA* transcription. The  $\Delta$ *toxA* mutant,  
186 which retains an intact *toxTA* promoter and *toxT* coding sequence (see Fig. 1), had 9-fold increased baseline  
187 expression of *toxT* in log phase cells (red line and points in Fig. 5). Expression increased further during competence



**Findlay-Black *et al.* A competence-regulated toxin-antitoxin system**

188 development, with the same kinetics as in wildtype cells, suggesting independent contributions from baseline  
189 repression by antitoxin and competence induction by CRP and Sxy. (Values for *toxA* expression are shown by the red  
190 points and line in Supp Fig. E, but are underestimates because most of the gene has been deleted.)

191 Since antitoxin is predicted to repress *toxTA* only when bound to toxin, we were initially surprised that knocking out  
192 *toxT* or both *toxT* and *toxA* did not increase RNA-seq coverage of *toxT* (Fig. 5, grey and black lines) and that knocking  
193 out both genes did not increase coverage of *toxA* (grey line in Supp Fig. E). These mutants retain all the upstream  
194 sequences and the *toxT* start codon, and enough sequence of the deleted genes to identify them in the RNA-seq  
195 analysis.) An explanation was suggested by a recent study of the *Escherichia coli hicAB* toxin/antitoxin system  
196 (Turnbull and Gerdes, 2017), and confirmed by more detailed analysis of *toxTA* transcripts. The HicA (toxin) and HicB  
197 (antitoxin) proteins have no detectable sequence homology to ToxT and ToxA, but their operon is also Sxy-regulated  
198 and has the same atypical organization (toxin before antitoxin) (Sinha 2009). Turnbull and Gerdes show that the  
199 *hicAB* operon has two promoters. Promoter P1 has a CRP-S site regulated by CRP and Sxy, which is not repressed by  
200 the HicB antitoxin. A secondary promoter P2 is very close to the *hicA* start codon; it is repressed by HicB  
201 independently of HicA, and its shortened transcripts produce only functional HicB, not HicA. Promoter P1 of this  
202 *hicAB* system thus resembles the CRP-S regulation of the *toxTA* operon, and the presence of a second antitoxin-  
203 regulated internal promoter similar to P2 would explain the high *toxTA* operon expression seen in the *toxA*  
204 knockouts.

205 This finding in the *hicAB* system prompted us to do a more detailed analysis of *toxTA* transcription patterns in  
206 wildtype and mutant cells to determine whether the *toxTA* transcripts expressed in the absence of *toxA* were  
207 similarly truncated. Figure 6A shows RNA-seq coverage of the *toxTA* promoter region and the 5' half of *toxT*, in  
208 wildtype cells and in the *toxA* deletion mutant (note that transcription of *toxTA* is from right to left). As expected, the  
209 predicted CRP-S promoter upstream of *toxTA* was active only at T=30 and T=100; its activity was not affected by  
210 deletion of *toxA*. Deletion of *toxA* instead caused strong constitutive transcription from a second promoter ('P2'),  
211 with reads beginning about 30 bp downstream of the *toxT* start codon. Transcripts produced from this start point are  
212 unlikely to produce active ToxT; the only other in-frame AUG in *toxT* is 30 bp from the end of the gene, and it and the

**Findlay-Black *et al.* A competence-regulated toxin-antitoxin system**

213 first GUG (position 35) lack Shine-Dalgarno sequences. This supports the hypothesis that the *H. influenzae toxTA*  
214 operon is regulated similarly to the *E. coli hicAB* operon, with the antitoxin repressing transcription from a  
215 downstream 'P2' promoter whose transcript produces antitoxin but not toxin.

216 In the *E. coli hicAB* system, P2 is repressed by HicB antitoxin alone, binding of HicB to the P2 operator is destabilized  
217 when HicA toxin is abundant, and transcription from P2 in plasmid constructs is elevated when the chromosomal  
218 *hicAB* operon is deleted (Turnbull and Gerdes, 2017). To see if this also happens in *H. influenzae's toxTA*, we  
219 measured transcription in wildtype and *toxTA* mutant cells more accurately by scoring the coverage at two positions  
220 in the *toxTA* operon (indicated by red vertical lines at the bottom of Fig. 6A). Position 0 is the *toxT* start codon, 34 nt  
221 downstream from the CRP-S promoter ( $P_{CRP-S}$ ) but upstream of the putative P2 promoter, and position 100 is about  
222 70 nt downstream from P2 (P2 and position 100 are deleted in  $\Delta toxT$ ). To eliminate read-mapping artefacts arising  
223 from failure to align reads that span an insertion or deletion, each mutant's reads were mapped onto its own *toxTA*  
224 sequence rather than the reference sequence. Comparison of Figures 6B and 6C shows that coverage at position 100  
225 was always higher than coverage at position 0, consistent with the presence of a second promoter between positions  
226 0 and 100. Fig. 6B also shows that coverage at position 0 (expression from  $P_{CRP-S}$ ) was reduced by all of the *toxTA*  
227 deletions. This was unexpected, and suggests that this promoter may have unusual properties, since coverage of  
228 other CRP-S genes was not similarly affected. The *toxA* deletion caused the predicted increase in coverage at  
229 position 100 (Fig. 6C), but the *toxTA* deletion unexpectedly reduced rather than increased coverage at this position  
230 ~3-fold from the wildtype level, even though this construct retains the first 150 bp of the operon, including P2. This  
231 reduction was not accounted for by the reduction in expression from  $P_{CRP-S}$ , suggesting that high-level transcription  
232 from the *toxTA* P2 promoter only occurs when ToxT is present and ToxA is absent. This could mean either that ToxT  
233 directly binds the P2 promoter to induce transcription, which seems unlikely given its lack of DNA-binding domain, or  
234 it could mean that the presence of ToxT disrupts binding of a secondary repressor of the operon, such as a  
235 noncognate antitoxin (Goeders and Van Melderen, 2014).

236 **ToxT does not prevent induction of the competence regulon:** To investigate how deletion of the *toxTA* antitoxin  
237 causes severe defects in DNA uptake and transformation, we first examined changes in expression of the genes that

**Findlay-Black *et al.* A competence-regulated toxin-antitoxin system**

238 regulate the competence regulon. Comparison of the RNA-seq data for wildtype cells (orange) and *toxT*, *toxA* and  
239 *toxTA* mutants (yellow, blue and grey) ruled out direct inhibition of competence gene expression by a *toxT*-encoded  
240 toxin. Unopposed expression of *toxT* (in the  $\Delta toxA$  mutant) only slightly reduced induction of the *sxy* transcript  
241 needed for induction of the competence regulon (Supp. Fig. F-A, blue line). Importantly, similar modest reductions  
242 were also seen in the other *toxTA* mutants (grey and yellow lines), which have normal competence. The mRNA levels  
243 of *crp* and *cya* (CRP (HI0957) and adenylate cyclase (HI0604)) were also not changed by  $\Delta toxA$  (Supp. Fig. F-B and F-  
244 C).

245 The competence operons induced by these regulators also retained normal or near-normal expression in the  $\Delta toxA$   
246 mutant at 30 min after transfer to MIV, the time when competence-induced gene expression is highest (Fig. 7). As  
247 noted above for *sxy*, competence gene expression levels at this time were very similar between the  $\Delta toxA$  mutant,  
248 which cannot take up DNA or transform, and the  $\Delta toxT$  and  $\Delta toxTA$  mutants, which take up DNA and transform  
249 normally (Supp. Fig. G-A and G-B). Although expression of most of the competence operons was substantially  
250 reduced in  $\Delta toxA$  cells at the t=100 min time point (Supp. Fig. G-C), this effect was too little and too late to explain  
251 the mutant cells' complete lack of competence.

252 **Other ToxT and ToxA effects in competence-induced cells:** Since changes in competence gene expression could not  
253 readily explain the severe competence defect of  $\Delta toxA$ , we extended our investigation to genes not known to be  
254 involved in competence. Supp. Table 3 lists, for each timepoint, the genes whose expression was significantly  
255 different in the  $\Delta toxA$  mutant than in all three strains with normal competence (wildtype,  $\Delta toxT$  and  $\Delta toxTA$ ). In rich  
256 medium (T=0) the only statistically significant effect of  $\Delta toxA$  on gene coverage was about 1.5-fold increased  
257 expression of three genes in the HI0654-0658 operon, which are directly downstream from *toxA* (see Fig. 1) and thus  
258 may experience read-through from the *toxTA* P2 promoter (which was constitutively active in the  $\Delta toxA$  mutant).  
259 The operon includes genes encoding shikimate dehydrogenase, an ABC transporter, and a hypothetical protein with  
260 putative topoisomerase I domains. Expression of genes in this operon increased about 1.2-1.5-fold in MIV in wildtype  
261 cells and in other mutants with normal competence, suggesting that read-through also occurs from the *toxTA* CRP-S  
262 promoter. Their normal induction in competence suggests that their higher expression in  $\Delta toxA$  is unlikely to be

**Findlay-Black *et al.* A competence-regulated toxin-antitoxin system**

263 responsible for this strain's competence defect, but it may cause the slight  $\Delta toxA$  growth defect described above  
264 (Supp. Fig. A). The absence of other detectable changes in gene expression is consistent with the postulated lack of  
265 functional ToxT protein produced from the P2 promoter.

266 ToxT effects are also not expected at the 10 min time point, since the Sxy-dependent CRP-S promoter is not yet  
267 active. Only two genes were significantly changed in  $\Delta toxA$ : HI0655 (see above) and HI0231 (*deaD*), which encodes a  
268 DEADbox helicase involved in ribosome assembly and mRNA decay (Iost and Dreyfus, 2006). In all strains, this gene's  
269 expression falls rapidly on transfer to MIV, but levels in  $\Delta toxA$  were about 50% higher at all time points.

270 At the 30 min time point, seven genes' expression levels were significantly altered by deletion of *toxA*. Most were  
271 only changed by about 2-fold, but two genes had large increases at both the t=30 and t=100 time points and may be  
272 relevant to the competence defect: Deletion of *toxA* increased HI0235 expression 3-5-fold at t=30 and 2-3-fold at  
273 t=100 (in the  $\Delta toxT$  and  $\Delta toxTA$  comparisons, but not in the KW20 comparison. Its protein has strong similarity to the  
274 ArfA ribosome-rescue domain (Garza-Sanchez *et al.*, 2011); the significance of this is discussed below. HI0362  
275 encodes a CRP-regulated iron-transport protein that normally increases in MIV but does not increase in *toxA* deletion  
276 mutants.

277 Global RNA-seq analysis did not reveal any obvious candidate genes. Although many more genes were significantly  
278 changed by  $\Delta toxA$  at the 100 min time point, only four of these were also changed at t=30. Two of these, HI0235 and  
279 HI0362, were described above. Additionally, In all competent strains, HI0504 (*rbsB*, a ribose transporter component),  
280 was induced 20-fold more in MIV than other genes in its operon, but this increase was only 10-fold in  $\Delta toxA$  (at t=30  
281 as well as t=100). Expression of HI0595 (*arcC*, carbamate kinase) normally falls 2-3-fold immediately after transfer to  
282 MIV, but the fall was greater in  $\Delta toxA$ . 28 other genes were significantly changed only at t=100, but their expression  
283 patterns and predicted functions were diverse and did not suggest an explanation for  $\Delta toxA$ 's lack of competence.

284 Overall, this gene expression analysis did not reveal any promising mechanisms through which unopposed *toxT*  
285 expression could prevent competence.

**Findlay-Black *et al.* A competence-regulated toxin-antitoxin system**

286 **Related toxins may suggest mechanism of action:** Since examination of gene expression shed little light on how the  
287 ToxT toxin prevents competence, as an alternative approach we considered the modes of action of well-studied  
288 relatives of ToxT. The most common type II toxins act as translation-blocking ribonucleases, such as RelE, but several  
289 alternative modes of action are also known, and some newly discovered toxins lack identified activities (Makarova *et*  
290 *al.*, 2009). The Pfam and TAFinder databases assign the *H. influenzae* ToxT protein to the ParE/RelE toxin superfamily,  
291 whose characterized members include both ribonucleases and gyrase inhibitors (Goeders and Van Melderen, 2014).  
292 Because *toxTA* shares regulatory features, gene order, and chromosomal location with *E. coli*'s *hicAB*, we gave special  
293 consideration to the possibility that their toxins also share a mechanism; the HicA toxin is a ribonuclease that arrests  
294 cell growth by cleaving mRNAs and other RNAs (Jorgensen *et al.*, 2009).

295 **Unopposed toxin does not inhibit gyrase:** If ToxT inhibited gyrase we would expect the RNA-seq data to show that  
296 transfer to MIV caused increased expression of *gyrA* (HI1264) and *gyrB* (HI0567) and reduced expression of *topA*  
297 (HI1365), since these genes have opposing activities and compensatory regulation by DNA supercoiling (Gmuender *et*  
298 *al.*, 2001). However, these genes' coverage levels were similar in wildtype and all *toxTA* mutants, during both  
299 exponential growth and competence development.

300 **Unopposed toxin does not cleave competence-induced mRNAs site-specifically:** The best-studied homologs of the  
301 *toxT* toxin act by cleaving mRNAs at random positions near their 5' ends during their translation on the ribosome  
302 (Hurley, 2011, Goeders *et al.*, 2013). Thus we considered whether ToxT might prevent competence by one of two  
303 mechanisms. First, ToxT might specifically cleave the 5' ends of competence-gene transcripts, eliminating their  
304 function without significantly changing their overall RNA-seq coverage levels or otherwise interfering with essential  
305 cell functions. Visual examination of RNA-seq coverage of all positions within the competence operons did not reveal  
306 any anomalies that might indicate that the mRNA in  $\Delta$ *toxA* cells had been inactivated either by cleavage at specific  
307 sites or by random cleavage near the 5' end (Gordon *et al.*, 2017). As an example, Supp Fig. H compares read  
308 coverage across the *comNOPQ* operon in wildtype and  $\Delta$ *toxA* cultures after 30 min in MIV.

**Findlay-Black *et al.* A competence-regulated toxin-antitoxin system**

309 **Unopposed toxin may nonspecifically cleave mRNAs:** A second mechanism we considered was that ToxT might  
310 nonspecifically cleave mRNAs. This would result in a large population of mRNAs lacking in-frame stop codons ('non-  
311 stop' mRNAs). Because these cannot undergo the normal ribosome-release process, this would cause a general block  
312 to translation (Tollervey, 2006). This block in turn is predicted to arrest cell growth until normal translation can be  
313 restored (Pandey and Gerdes, 2005). To indirectly detect such cleavage, we examined the insert sizes of our RNA-seq  
314 sequencing libraries by comparing the spanning length distributions of paired-end sequencing reads among strains.  
315 Because independent library preparations had different insert sizes, comparisons were limited to samples prepared  
316 at the same time. Fig. 8 shows that the  $\Delta toxA$  samples from library batch 1 had shorter fragment sizes than the  
317 KW20 samples from the same batch, and that the difference increased as the time after competence induction  
318 increased. This supports the hypothesis that the extreme lack of competence in  $\Delta toxA$  cultures is due to non-specific  
319 ToxT cleavage of mRNAs.

320 Additional support for a generally toxic effect on translation comes from the *toxA* deletion's effects on genes known  
321 to rescue ribosomes that have stalled on non-stop mRNAs. *H. influenzae* has two rescue systems: In the first, an  
322 abundant small RNA named transfer-messenger RNA (tmRNA), binds with its protein cofactor SmbB to arrested  
323 ribosomes, detaches both the non-stop mRNA and the incomplete protein, and tags the protein for degradation. In  
324 the second rescue system, ArfA recruits ribosome release factor 2 (HI1212) to the ribosome and causes it to cleave  
325 the nascent peptidyl-tRNA (Keiler, 2015). Translation of *arfA* is increased when tmRNA activity is reduced (Garza-  
326 Sanchez *et al.*, 2011). Consistent with these expectations, tmRNA (HI1281.2) is downregulated in the  $\Delta toxA$  mutant,  
327 however, as noted above, the *arfA* homolog HI0235 is upregulated several fold (Christensen *et al.* 2003a, 2003b).

328 **Sxy regulation of TA systems:** Jaskolska and Gerdes (2015) and Sinha *et al.*, (2009) reported that three other *E. coli*  
329 TA operons are regulated by Sxy, so we examined the promoter sequences and expression levels of the other seven  
330 *H. influenzae* TA operons. None of the promoters had strong matches to the *H. influenzae* CRP-S consensus  
331 (Cameron and Redfield, 2008, Sinha *et al.*, 2009) and their RNA abundance levels showed no evidence of  
332 competence-regulated expression or dependence on Sxy.

**Findlay-Black et al. A competence-regulated toxin-antitoxin system**

333 **Phylogenetic evidence for lateral transfer of the *toxTA*:** Since toxin/antitoxin operons are highly mobile (Makarova  
334 *et al., 2009*), we examined the distribution of the *toxTA* operon in other strains and species (Fig. 9). *toxTA* operons  
335 are present at the same genomic location in most *H. influenzae* genomes (see below) and in the closely related *H.*  
336 *haemolyticus*, but there are no recognizable homologs in most other bacteria (including most other members of the  
337 Pasteurellaceae). Instead, most identifiable homologs (with about 60% identity) are in a very distant group, the  
338 Firmicutes, especially *Streptococcus* (96 of the top 100 BLAST hits to ToxT outside the Pasteurellaceae are to diverse  
339 *Streptococcus* species). This suggests that the *toxTA* operon may have been transferred from a Firmicute into a  
340 recent ancestor of *H. influenzae* and *H. haemolyticus*. When we excluded *Streptococcus* spp. from the BLAST search,  
341 sporadic matches were found in a wide variety of other taxa. In addition, *toxTA* operons with about 50% identity  
342 were found in one other small Pasteurellacean clade (*Actinobacillus sensu stricto*), and on two 11kb plasmids  
343 (pRGRH1858 and pRGFK1025) from an uncultured member of a rat gut microbiome and an uncultivated *Selenomonas*  
344 sp. The distribution is summarized in Fig. 9A.

345 To resolve the history of gene transfer events in the two Pasteurellaceae sub-clades, we created an unrooted  
346 maximum likelihood phylogeny of concatenated *toxT* and *toxA* homologs from selected species where both genes are  
347 present (Fig. 9B). Although there is 99% bootstrap support for a *Haemophilus-Actinobacillus* clade, the absence of  
348 homologs from all other Pasteurellaceae makes a single Pasteurellacean origin unlikely, since it would require there  
349 to have been multiple deletions in other Pasteurellacean subclades, or a second lateral transfer. Since the  
350 *Actinobacillus* sequences are also more distant from the *Haemophilus* sequences than from the *Streptococcus*  
351 sequences, the two Pasteurellacean groups may instead have acquired their *toxTA* operons by independent lateral  
352 transfers, probably from Firmicutes, since these homologs have the highest identity to the Pasteurellacean  
353 sequences. The alternative hypothesis of a single Pasteurellacean origin requires that acquisition was followed by  
354 multiple deletions, though the analysis in the next paragraph makes this less implausible.

355 **Deletions in *H. influenzae toxT* are common:** 181 *H. influenzae* genome sequences were available for examination.  
356 (Supp table #???) Of these, 162 had recognizable *toxA* sequences. All of these encoded full length ToxA proteins, but  
357 all except 24 had one of two common deletions affecting *toxT*. The extents of these deletions are shown by the dark

**Findlay-Black *et al.* A competence-regulated toxin-antitoxin system**

358 grey bars at the bottom of Fig. 10. The most common deletion (n=93) removed 178 bp of *toxT* coding sequence but  
359 left both promoters intact. The second (n=45) removed 306 bp of sequence including both *toxTA* promoters and the  
360 *toxT* start codon. The 19 genomes that lacked recognizable *toxA* sequences all had the same 1015 bp deletion  
361 removing both *toxT* and *toxA* but leaving the flanking genes intact. In place of the missing sequences were 87 bp that  
362 have no homologs in GenBank. The average pairwise distance among the 162 *toxA* genes is 0.106, which is slightly  
363 higher than 0.088, the average of all genes with at most one copy per strain. The  $d_N/d_S$  ratio of 0.037 is consistent  
364 with mild purifying selection on *toxA* and is higher than the average gene, which is 0.243. However, the strength of  
365 selection may be underestimated, since most *toxAs* lack functional *toxT* and/or may not be expressed due to  
366 deletions. Both sequence divergence and the high frequency of *toxT* deletions agree with expectations for a  
367 toxin/antitoxin system whose antitoxin protects against a toxin that is at least mildly deleterious.

368 As mentioned above, the *E. coli* HicA and HicB protein sequences have little sequence similarity to ToxT and ToxA,  
369 and our wildtype *H. influenzae* strain (KW20, Rd) lacks a *hicAB* operon, but Syed and Gilsdorf (2007) found that 69/79  
370 other *H. influenzae* strains were positive for *hicAB* by dot-blot analysis, so we examined the *hicAB* genes in our set of  
371 181 *H. influenzae* genomes. Like *toxTA*, the *hicAB* operons in most *H. influenzae* strains have intact antitoxin (*hicB*)  
372 genes but deletions in their toxin (*hicA*) genes. Of the 181 strains examined, 122 were tagged as having *hicB*. All but  
373 20 of these have a 250 bp deletion that removes both *hicAB* promoters and the first 50 bp of *hicA*. Many strains that  
374 lack *hicAB* share a large deletion that removes a large multi-gene 7147 bp segment flanked by a 57 bp duplication,  
375 but others have more complex structures that were not investigated further. Overall, the deletion pattern of the *H.*  
376 *influenzae* *hicAB* genes resembles that of *toxTA*, with frequent deletions of the toxin gene but preservation of the  
377 antitoxin.

378 **Might the variation in *toxTA* help explain the observed strain-specific variations in DNA uptake and**  
379 **transformation?** Maughan and Redfield (2009) measured the ability of 34 *H. influenzae* strains to both take up DNA  
380 and become transformed, so we examined this data for correlations with the presence of *toxTA* in the 19 of these  
381 strains whose *toxTA* and *hicAB* genotypes we were able to determine. All but one of the 19 strains had a complete  
382 *toxA* coding sequence but only five had intact *toxTA* operons. Of the rest, four had the large deletion that removed



**Findlay-Black *et al.* A competence-regulated toxin-antitoxin system**

383 both *toxTA* promoters, nine had the smaller deletion internal to *toxT*, and one had the 1015 bp complete deletion.  
384 There was no obvious correlation between the *toxTA* genotypes and the DNA uptake or transformation phenotypes,  
385 but there was insufficient data for a high powered analysis.

386 **Does the *Actinobacillus pleuropneumoniae* *toxTA* operon affect competence?** The *A. pleuropneumoniae* *toxTA*  
387 operon was originally reported to have the CRP-S promoter typical of competence operons (Bosse *et al.*, 2009).  
388 Although reexamination of the promoter region failed to identify a high-quality CRP-S site, we constructed *toxT*, *toxA*  
389 and *toxTA* knockout mutants to investigate whether a *toxA* deletion would prevent competence. There were no  
390 significant differences between the transformation frequencies of wildtype cells and all *toxTA* mutants. Thus we  
391 conclude that the *A. pleuropneumoniae* *toxTA* operon does not affect competence. Expression of the *toxT* gene in  
392 the absence of the antitoxin had no detectable effect on growth or survival.

393

394 **DISCUSSION**

395 Our investigation into why a HI0659 knockout prevents competence has provided a simple answer: HI0659 encodes  
396 an antitoxin (ToxA) needed to block the expression and competence-preventing activity of the toxin encoded by  
397 HI0660 (ToxT). But this answer has generated a number of new questions that we have only partially answered.  
398 Why is competence controlled by a toxin/antitoxin system? How does this system completely abolish DNA uptake  
399 and transformation without causing significant cell death? How did this TA system come to be competence-  
400 regulated? Does it confer any benefit to the cells, either generally or competence-specific?

401 Several findings support the conclusion that HI0660 and HI0659 encode proteins that function as a toxin/antitoxin  
402 pair. First is the similarity of the encoded ToxT and ToxA proteins to biochemically characterized toxin and antitoxin  
403 proteins of the RelE/ParE families. Second, and the strongest evidence, is the restoration of normal DNA uptake and  
404 transformation to antitoxin-knockout cells when the putative toxin is also knocked out. Third is the regulatory  
405 similarity between this system and the *hicAB* system of *E. coli*.

**Findlay-Black *et al.* A competence-regulated toxin-antitoxin system**

406 **How did the *toxTA* operon come to be in the *H. influenzae* genome and under competence regulation?** *H.*  
407 *influenzae* acquired its *toxTA* operon by horizontal transfer, either into a deep ancestor of the Pasteurellaceae or  
408 independently into more recent ancestors of *H. influenzae* and *A. pleuropneumoniae*. The closest relatives of the  
409 *toxTA* genes are in the distantly related Firmicutes, with homologs especially common in *Streptococcus* species. Since  
410 the Streptococci and Pasteurellaceae share both natural competence and respiratory-tract niches in many mammals,  
411 there may have been frequent opportunities for horizontal transfer between them.

412 We do not know how the *toxTA* operon came to be under CRP-S regulation. The *toxTA* operon's strong regulatory  
413 parallels with the *E. coli hicAB* system suggest two explanations. One hypothesis is a distant shared evolutionary  
414 origin of the two systems, with selection maintaining regulation more strongly than protein sequence. Based on this  
415 hypothesis, the strong sequence similarity between the Pasteurellacean and Streptococcal *toxTA* systems then  
416 predicts that the regulatory features shared by the Pasteurellacean *toxTA* systems and the more-distant *hicAB*  
417 system (a competence-regulated promoter producing both proteins and an antitoxin-regulated promoter producing  
418 only antitoxin) could also be shared by the Streptococcal homologs. However, it is also possible that toxin-antitoxin  
419 systems with similar regulation and function have adopted similar roles in separate instances, a phenomenon which  
420 is more likely in toxin antitoxin systems as they undergo frequent horizontal transfers and are often under strong  
421 selective pressure. The *sxy* gene and the CRP-S promoters it regulates are not known outside of the Gamma-  
422 Proteobacteria sub-clade that contains the Vibrionaceae, Enterobacteraceae, Pasteurellaceae and Orbaceae  
423 (Cameron *et al.*, 2006). Thus, it would be interesting to examine the regulation and function of the *toxTA* homologs  
424 outside the Pasteurellaceae to determine when and where it adopted a regulatory role and the mechanism of the  
425 toxic activity. Examining these homologs could give insight into both the mechanism of action of the *H. influenzae*  
426 *toxTA* system, and its evolutionary history.

427 **How does unopposed ToxT prevent DNA uptake and transformation?** The transformation defect caused by deletion  
428 of the antitoxin gene *toxA* is very severe, so it was surprising that RNA-seq analysis detected only few and minor  
429 changes in expression of competence genes. Instead, the best explanation is that ToxT is an mRNA-cleaving  
430 ribonuclease, whose activity causes a general block to translation that prevents functioning of the induced

**Findlay-Black *et al.* A competence-regulated toxin-antitoxin system**

431 competence genes. The most direct evidence is the decrease in insert size distributions seen in  $\Delta toxA$  mutants, but  
432 this conclusion is also supported by the combination of regulatory similarities between the *toxTA* and *hicAB* systems  
433 and by sequence similarities between the ToxT protein and Type II ribonuclease toxins.

434 **Why then does the  $\Delta toxA$  mutant not suffer from growth arrest or toxicity?** Part of the explanation is that mRNAs  
435 encoding functional ToxT are only expressed after cells have been transferred to competence-inducing starvation  
436 medium, a condition that severely slows cell growth and division even in wildtype cells. Detecting the predicted  
437 competence-specific toxicity is further complicated by the uneven distribution of transformability in competence-  
438 induced cells. Co-transformation experiments using multiple unlinked markers consistently show that no more than  
439 half, and sometimes as little as 10%, of the cells in a MIV-treated culture produce recombinants (Mell and Redfield,  
440 2014). We do not know whether only the transforming cells express the competence genes or all cells express them  
441 but some fail to correctly assemble the DNA uptake or recombination machinery. If only a modest fraction of the  
442 cells in a competent culture are expressing the toxin then any toxic effect on culture growth and survival will be more  
443 difficult to detect.

444 **Does this operon confer any benefit (or harm) on *H. influenzae*?** Why have a competence-regulating toxin/antitoxin  
445 system at all, when it has no detectable effect on competence unless its antitoxin component is defective?  
446 Regulatory parallels with the *hicAB* system suggest that CRP-S regulation is not incidental. We found no direct  
447 evidence of any toxin-dependent alteration to the normal development of competence. Production of Sxy is subject  
448 to post-transcriptional regulation by the availability of nucleotide precursors (Macfadyen *et al.*, 2001, Sinha *et al.*,  
449 2013), and we have elsewhere proposed that DNA uptake is an adaptation to obtain nucleotides when nucleotide  
450 scarcity threatens to arrest DNA replication forks (Mell and Redfield, 2014). In this context, competence-induction of  
451 the *toxTA* operon may be a specialization to help cells survive, by slowing or arresting protein synthesis until the  
452 nucleotide supply is restored.

453 However, the high frequency of deletions that remove either complete *toxTA* or both promoters (35%) indicates that  
454 the operon is dispensable. And the even higher frequency of toxin-inactivating deletions in the presence of intact

**Findlay-Black *et al.* A competence-regulated toxin-antitoxin system**

455 antitoxin genes and CRP-S promoter (51%), coupled with the absence of any deletion that inactivates antitoxin but  
456 preserves toxin indicates that unopposed toxin is indeed harmful under some natural circumstances.

457 We have examined the *toxTA* operon from many angles and answered our initial question of why *toxA* knockout  
458 prevents competence in *H. influenzae*, but have raised new questions whose eventual answers we hope will give us  
459 greater insight not just into the *toxTA* system, but competence regulation in general.

460

461 **METHODS**

462 **Bacterial strains, plasmids, and growth conditions**

463 Bacterial strains used in this work are listed in Supp Table 1. *Escherichia coli* strain DH5 $\alpha$  [F80lacZ #(lacIZYA-argF  
464 endA1)] was used for all cloning steps; it was cultured in Luria-Bertani (LB) medium at 37°C and was made competent  
465 with rubidium chloride according to the method provided in the QIAexpressionist manual protocol 2 (Qiagen). When  
466 antibiotic selection was required, 100  $\mu$ g/mL ampicillin and 50 $\mu$ g/mL spectinomycin were used.

467 *Haemophilus influenzae* cells were grown in sBHI medium (Brain Heart Infusion medium supplemented with  
468 10mg/mL hemin and 2mg/mL NAD) at 37°C in a shaking water bath (liquid cultures) or incubator (plates). *H.*  
469 *influenzae* strain Rd KW20 (Alexander and Leidy 1951), the standard laboratory strain, was used as the wild type for  
470 all experiments. Mutant strains used in this study were marked deletion mutants in which the coding region of the  
471 gene was replaced by a spectinomycin resistance cassette, as well as unmarked deletion mutants derived from these  
472 strains; the generation of these mutant strains is described in Sinha *et al.* (2012). Specifically, we used an unmarked  
473 deletion of HI0659 (HI0659-), marked and unmarked deletions of HI0660 (HI0660::spec, HI0660-), and a marked  
474 deletion of the whole operon (HI0659/HI0660::spec). Knockout mutants of *crp* and *sxy* have been described  
475 previously (Chandler, 1992, Williams *et al.*, 1994)

476 *Actinobacillus pleuropneumoniae* cells were grown in BHI-N medium (Brain Heart Infusion medium supplemented  
477 with 100 $\mu$ g/mL NAD) at 37°C. *A. pleuropneumoniae* strain HS143 (Blackall *et al.* 2002) was used as the wild type for

**Findlay-Black *et al.* A competence-regulated toxin-antitoxin system**

478 all experiments. Marked deletion mutants in which the gene of interest was replaced by a spectinomycin resistance  
479 cassette strains were generated for this study as described below. The HS143 genome region containing the  
480 homologs of the *Actinobacillus pleuropneumoniae* serovar 5b strain L20 APL\_1357 and APL\_1358 genes, plus  
481 approximately 1 kb of flanking sequence on each side, was PCR-amplified, ligated into Promega pGEM-T Easy and  
482 transformed into *E. coli*. Plasmid regions containing APL\_1357, APL\_1358, or both genes were deleted from the  
483 pGEM-based plasmid by inverse PCR, and the amplified fragments were blunt-end ligated to the spectinomycin  
484 resistance cassette (Tracy *et al.*, 2008) from genomic DNA of a *H. influenzae* comN::spec strain (Sinha *et al.*, 2012).  
485 Plasmids linearized with Scal were transformed into competent *A. pleuropneumoniae* HS143 and transformants were  
486 selected for spectinomycin resistance using 100µg/mL spectinomycin after 80 minutes of growth in nonselective  
487 medium.

488 **Generation of competent stocks**

489 To induce competence, *H. influenzae* and *A. pleuropneumoniae* were cultured in sBHI or BHI-N respectively and  
490 transferred to competence-inducing medium MIV (Herriot *et al.* 1970) when they reached an optical density at  
491 600nm (OD<sub>600</sub>) of approximately 0.25 (Poje and Redfield 2003). After incubation with gentle shaking at 37°C for a  
492 further 100 min (*H. influenzae*) or 150 min (*A. pleuropneumoniae*), cells were transformed or frozen in 16% glycerol  
493 at -80 °C for later use.

494 **Transformation assays**

495 **Transformation of MIV-competent cells:** Transformation assays were carried out as described by Poje and Redfield  
496 (2003). MIV-competent *H. influenzae* or *A. pleuropneumoniae* cells were incubated at 37°C for 15 minutes with  
497 1µg/ml DNA, then DNaseI (10µg/mL) was added and cultures were incubated for 5 minutes to ensure no DNA  
498 remained in the medium. *H. influenzae* cultures were transformed with MAP7 genomic DNA (Barcak *et al.* 1991),  
499 which carries resistance genes for multiple antibiotics, while *A. pleuropneumoniae* cultures were transformed with  
500 genomic DNA from an *A. pleuropneumoniae* strain with spontaneous nalidixic acid resistance (generated in this lab).  
501 Cultures were diluted and plated on both plain and antibiotic-containing plates (2.5µg/mL novobiocin for *H.*

**Findlay-Black et al. A competence-regulated toxin-antitoxin system**

502 *influenzae* cultures, 20ug/mL nalidixic acid for *A. pleuropneumoniae* cultures) and transformation frequencies were  
503 calculated as the ratio of transformed (antibiotic-resistant) cells to total cells. For *A. pleuropneumoniae*, transformed  
504 cells were given 80 minutes of expression time in BHI-N before plating.

505 **Time courses in rich medium:** *H. influenzae* cells from frozen stocks of overnight cultures were diluted in fresh sBHI  
506 and incubated with shaking at 37°C. Periodically, the OD<sub>600</sub> was measured, and at predetermined optical densities  
507 aliquots of the culture were removed and transformed with MAP7 DNA and plated as described above. **Bioscreen**  
508 **Growth Analysis:** The Bioscreen C apparatus (BioScreen Instruments Pvt. Ltd.) was used to measure growth. Cells  
509 frozen from overnight cultures were pre-grown at low density in sBHI, and 300µL aliquots of 100-fold dilutions were  
510 placed into 20 replicate wells of a 100-well Bioscreen plate. Wells at the edges of the plate were filled with medium  
511 alone as controls. Cells were grown in the Bioscreen at 37°C for 18 hours with gentle shaking, and OD<sub>600</sub> readings  
512 were taken every 10 minutes. Readings were corrected by subtracting the OD<sub>600</sub> measured for medium-only  
513 controls, and replicates for each strain were averaged at each time point to generate growth curves. Doubling times  
514 were calculated for each strain from the subset of time points that represents exponential growth phase, as  
515 determined by linearity on a semi-log plot of time versus OD<sub>600</sub>.

516 **Competence growth and survival time course:** Cells were grown in sBHI to a density of  $\sim 2 \times 10^8$  cfu/ml (OD<sub>600</sub> =  
517 0.075) and transferred to MIV. After 100 min (time for maximum competence development, an aliquot of each  
518 culture was diluted 1/10 into fresh sBHI for recovery and return to normal growth. A fraction of each culture was  
519 incubated in a shaking water bath, and aliquots of the initial and 'recovery' sBHI cultures were also grown and  
520 monitored in a Bioscreen incubator.

521 **Cyclic AMP competence induction:** *H. influenzae* cells in sBHI were incubated with shaking to an OD<sub>600</sub> of  
522 approximately 0.05. Cultures were split and 1mM cAMP was added to one half. At an OD<sub>600</sub> of approximately 0.3,  
523 aliquots were transformed with MAP7 DNA and plated as described above.

524 **Phylogenetic Analysis:** A nucleotide BLAST search (discontinuous MEGABLAST) and a protein BLAST search against  
525 translated nucleotide databases (tBLASTn) were used to identify homologs of the HI0659 and HI0660 genes (Altshul

**Findlay-Black *et al.* A competence-regulated toxin-antitoxin system**

526 *et al.* 1990). Protein sequences found by the tBLASTn search were retained for analysis if they showed greater than  
527 60% coverage and greater than 40% identity to the *H. influenzae* query sequence. For species with matching  
528 sequences in multiple strains, the sequence from only one strain was kept.

529 For species in which homologs of HI0659 and HI0660 were found next to one another, amino acid sequences of  
530 concatenated matrices were aligned by multiple-sequence alignment using MAFFT, version 7.220 (Kato, 2013), run  
531 from modules within Mesquite version 3.02 (Maddison and Maddison 2015). The L-INS-I alignment method was used  
532 due to its superior accuracy for small numbers of sequences. After inspection of the alignments, poorly-aligning  
533 sequences were removed from the analysis, and alignment was repeated.

534 Phylogenetic trees were generated using the RAxML (Stamatakis 2014) maximum likelihood tree inference program,  
535 run via the Zephyr package of Mesquite. For each gene, 50 search replicates were conducted, using the  
536 PROTGAMMAAUTO option to allow RAxML to automatically select the best protein evolution model to fit the data.  
537 Since these trees were found to correspond exactly to a set of trees generated using the PROTGAMMAJTT model,  
538 this faster model was used to generate a majority-rules consensus tree from 1000 bootstrap replicates for each gene.

539 **Analysis of natural deletions:** 181 publicly available *H. influenzae* genomes were downloaded from NCBI and the  
540 Sanger centre. (Supp table #???) Genomes were re-annotated using Prokka v1.11 (Seemann, 2014), and the  
541 pangenome was calculated using Roary v3.5.1 (Page *et al.*, 2015) with a minimum blastp threshold of 75. The *toxA*  
542 gene cluster in the pangenome was identified by finding the gene cluster that contained the *toxA* gene from Rd  
543 KW20, and the *hicA* cluster was identified by finding the gene cluster that contained the *hicA* gene from PittAA. 2300  
544 bp genome sequences centered on *toxA* and/or *hicA* were extracted from all *H. influenzae* genomes containing  
545 recognizable *toxA* and/or *hicB* genes, and aligned by the MAFFT server. For strains that lacked recognizable *toxA* or  
546 *hicB*, sequences adjacent to the genes that normally flanked each operon were extracted.  $K_a/K_s$  and pairwise distance  
547 were calculated for each gene using SeqinR v 3.4-5 (Charif and Lobry, 2007) with codon aware gene alignments were  
548 made using Prank (v.100802).

549 **RNA-seq analysis:**

**Findlay-Black *et al.* A competence-regulated toxin-antitoxin system**

550 **Sample Preparation:** Cell cultures of *H. influenzae* strain Rd,  $\Delta crp$  and  $\Delta sxy$  derivatives, and  $\Delta toxTA$  mutants were  
551 grown in sBHI to an OD<sub>600</sub> of 0.2 – 0.25, then transferred to MIV. Aliquots of cells were removed just prior to transfer  
552 to MIV, and after 10, 30, and 100 minutes in MIV, and immediately mixed with Qiagen RNAprotect (#76526) to  
553 stabilize RNA. Cells were pelleted and frozen, and RNA was later extracted from thawed pellets using the Qiagen  
554 RNeasy Min-elute Cleanup Kit (#74204). Contaminating DNA was removed with Ambion Turbo DNase (#AM2238),  
555 and ribosomal RNA was depleted using the Illumina Ribo-Zero rRNA Removal kit (#MRZMB126). Sequencing libraries  
556 were prepared using TruSeq mRNA v2 library preparation kit, according to manufacturer's instructions (Illumina).  
557 Libraries were pooled and sequenced on a HiSeq 2500, generating paired-end 100 bp reads.

558 **Data Analysis Pipeline:** FASTQ files were analysed using the FASTQC tool (Andrews, 2015) to confirm read quality.  
559 Reads were aligned to the *H. influenzae* Rd KW20 reference genome sequence using the Burrows-Wheeler Alignment  
560 tool (BWA) algorithm `bwa mem` (Li and Durbin, 2009). Differential expression analysis was performed using the  
561 DESeq2 package, v.1.6.3 (Love *et al.*, 2013). Specifically, the function `DESeqDataSetFromMatrix()` was used to  
562 generate a dataset to compare reads from each mutant strain reads from the wild-type control based on their strain,  
563 sample time point, and the interaction between the two parameters. The function `DESeq()` was called to  
564 determine which genes were differentially expressed based on these parameters, using p-values adjusted for a B-H  
565 false-discovery rate (Benjamini and Hochberg, 1995) of 0.1 as a cut-off to determine significance, after normalizing  
566 total read counts and variances.

567  
568 **ACKNOWLEDGEMENTS:** We thank Lauri Lintott for helpful discussions, Charles Thompson for the use of the  
569 BioScreen, and Anni Zhang and Yvonne Yiu for technical assistance. This work was supported by funding from  
570 Canadian Institutes of Health Research to RJR, and an NIH F32 AI084427 grant to JCM. Sequencing work was  
571 performed at the Sequencing and Bioinformatics Consortium at the University of British Columbia, supported by  
572 grants from NASA and the faculty of Pharmaceutical Sciences.

573



Findlay-Black *et al.* A competence-regulated toxin-antitoxin system

574

575 **References**

- 576 Alexander, H.E., and Leidy, G. (1951) Determination of inherited traits of *H. influenzae* by desoxyribonucleic acid  
577 fractions isolated from type-specific cells. *Journal of Experimental Medicine*. 93: 345-359.
- 578 Altschul, S.F., Gish, W., Miller, W., Myers, E.W., Lipman, D.J. (1990) Basic Local Alignment Search Tool. *Journal of*  
579 *Molecular Biology*. **215(3)**: 403-410.
- 580 Ambur, O.H., Engelstädter, J., Johnsen, P.J., Miller, E.L., Rozen, D.E. (2016) Steady at the wheel: conservative sex and  
581 the benefits of bacterial transformation. *Philosophical Transactions of the Royal Society B*. **371(1706)**:  
582 doi:10.1098/rstb.2015.0528
- 583 Andrews, S. (2015) FastQC: A quality control tool for high throughput sequence data  
584 <http://www.bioinformatics.babraham.ac.uk/projects/fastqc/>
- 585 Barcak, G.J., Chandler, M.S., Redfield, R.J., Tomb, J.F. (1991) Genetic systems in *Haemophilus influenzae*. *Methods in*  
586 *Enzymology*. **204**: 321-342.
- 587 Benjamini, Y., and Hochberg, Y. (1995) Controlling the false discovery rate: a practical and powerful approach to  
588 multiple testing. *Journal of the Royal Statistical Society*. 57(1): 285-300.
- 589 Bosse, J.T., Sinha, S., Schippers, T., Kroll, J.S., Redfield, R.J., Langford P.R. (2009) Natural competence in strains of  
590 *Actinobacillus pleuropneumoniae*. *FEMS Microbiology Letters*. **298**: 124-130.
- 591 Cameron, A.D.S., Redfield, R.J. (2006) Non-canonical CRP sites control competence regulons in *Escherichia coli* and  
592 many other gamma-proteobacteria. *Nucleic Acids Research*. **34(20)**: 6001-6014.
- 593 Cameron A.D.S., and Redfield R.J. (2008) CRP binding and transcription activation at CRP-S sites. *Journal of Molecular*  
594 *Biology*. **383(2)**: 313-323.
- 595 Chandler, M.S. (1992) The gene encoding cAMP receptor protein is required for competence development in  
596 *Haemophilus influenzae* Rd. *Proceedings of the National Academy of Sciences U.S.A.* **89(5)**: 1626-30.
- 597 Charif D., and Lobry J.R. (2007) SeqinR 1.0-2: A contributed package to the R Project for statistical computing devoted  
598 to biological sequences retrieval and analysis *Structural Approaches to Sequence Evolution*. Springer, Berlin,  
599 Heidelberg. doi:[https://doi.org/10.1007/978-3-540-35306-5\\_10](https://doi.org/10.1007/978-3-540-35306-5_10)
- 600 Dorocicz, I.R., Williams, P.M., and Redfield, R.J. (1993) The *Haemophilus influenzae* adenylate cyclase gene: cloning,  
601 sequence, and essential role in competence. *Journal of Bacteriology*. **175(22)**: 7142-7149.
- 602 Garza-Sanchez, F., Shaub, R.E., Janssen, B.D., Hayes, C.S. (2011) tmRNA regulates synthesis of the ArfA ribosome  
603 rescue factor. *Molecular Microbiology*. **80(5)**: 1204-1219.
- 604 Gmuender, H., Kuratli, K., Di Padova, K., Gray, C.P., Keck, W., Evers, S. (2001) Gene expression changes triggered by  
605 exposure of *Haemophilus influenzae* to novobiocin or ciprofloxacin: combined transcription and translation analysis.  
606 *Genome Research*. **11**: 28-42.

**Findlay-Black et al. A competence-regulated toxin-antitoxin system**

- 607 Goeders, N., Dreze, P-L., and Van Melderen, L. (2013) Relaxed cleavage specificity within the RelE toxin family.  
608 *Journal of Bacteriology*. **195(11)**: 2541-2549.
- 609 Goeders, N., and Van Melderen, L. (2014) Toxin-antitoxin systems as multilevel interaction systems. *Toxins*. **6(1)**: 304-  
610 324.
- 611 Gordon, G.C., Cameron, J.C., Pflieger, B.F. (2017) RNA sequencing identifies new RNase III cleavage sites in *Escherichia*  
612 *coli* and reveals increased regulation of mRNA. *mBio*. **8(2)**: e00128-17.
- 613 Hanahan, D. (1983) Studies on transformation of *Escherichia coli* with plasmids. *Journal of Molecular Biology*. **166**:  
614 557-580.
- 615 Hurley, J.M., Cruz, J.W., Ouyang, M., Woychik, N.A. (2011) Bacterial toxin RelE mediates frequent codon-independent  
616 mRNA cleavage from the 5' end of coding regions *in vivo*. *Journal of Biological Chemistry*. **286**: 14770-14778.
- 617 Iost, I., and Dreyfus, M. (2006) DEAD-box RNA helicases in *Escherichia coli*. *Nucleic Acids Research*. **34(15)**: 4189–  
618 4197.
- 619 Johnston, C., Martin, B., Fichant, G., Polard, P., and Claverys, J.-P. (2014) Bacterial transformation: distribution,  
620 shared mechanisms and divergent control. *Nature Reviews Microbiology* **12**: 181-196.
- 621 Jakolska, M., and Gerdes, K. (2015) CRP-dependent positive autoregulation and proteolytic degradation regulate  
622 competence activator Sxy of *Escherichia coli*. *Molecular Microbiology*. **95(5)**: 833-845.
- 623 Jorgensen, M.G., Pandey, D.P., Jaskolska, M., Gerdes, J. (2009) HicA of *Escherichia coli* defines a novel family of  
624 translation-independent mRNA interferases in bacteria and archaea. *Journal of Bacteriology*. **191(4)**: 1191-1199.
- 625 Katoh, S. (2013) MAFFT multiple sequence alignment software version 7: improvements in performance and  
626 usability. *Molecular Biology and Evolution*. **30**: 772-780.
- 627 Keiler K.C. (2015) Mechanisms of ribosome rescue in bacteria. *Nature Reviews Microbiology*. **13**: 285-297.
- 628 Letunic, I. (2007). Interactive Tree Of Life (iTOL): an online tool for phylogenetic tree display and annotation.  
629 *Bioinformatics*. **23(1)**: 127-128.
- 630 Li, H, and Durbin, R. (2009) Fast and accurate short read alignment with Burrows–Wheeler transform. *Bioinformatics*.  
631 **5(14)**: 1754-1760.
- 632 Love, M., Anders, S., Huber, W. (2013) Diferential analysis of RNA-Seq data at the gene level using the DESeq2  
633 package.
- 634 Macfadyen, L.P., Chen, D., Vo, H.C., Liao, D., Sinotte, R., Redfield, R.J. (2001) Competence development by  
635 *Haemophilus influenzae* is regulated by the availability of nucleic acid precursors. *Molecular Microbiology*. **40(3)**: 700-  
636 707.
- 637 Maddison, W.P. and Maddison, D.R. (2015) Mesquite: a modular system for evolutionary analysis. Version 3.02  
638 <http://mesquiteproject.org>

Findlay-Black *et al.* **A competence-regulated toxin-antitoxin system**

- 639 Makarova, K.S., Wolf, Y.I. and Koonin, E.V. (2009) Comprehensive comparative-genomic analysis of Type 2 toxin-  
640 antitoxin systems and related mobile stress elements in prokaryotes. *Biology Direct.* **4(19)**: doi:10.1186/1745-6150-4-  
641 19.
- 642 Maughan, H., and Redfield, R.J. (2009) Extensive variation In natural competence in *Haemophilus influenzae*.  
643 *Evolution.* **63(7)**: 1852-1866.
- 644 Mell, J.C., Lee, J.Y., Firme, M., Sinha, S., and Redfield, R.J. (2014) Extensive cotransformation of natural variation into  
645 chromosomes of naturally competent *Haemophilus influenzae*. *G3: Genes, Genomes, Genetics.* **4(4)**: 717-731.
- 646 Mell, J.C., and Redfield, R.J. (2014) Natural competence and the evolution of DNA uptake specificity. *Journal of*  
647 *Bacteriology.* **196(8)**: 1471-1483.
- 648 Overgaard, M., Borch, J., Jorgensen, M.G., and Gerdes, K. (2008) Messenger RNA interferase RelE controls *relBE*  
649 transcription by conditional cooperativity. *Molecular Microbiology.* **69(4)**: 841-857.
- 650 Page, A.J., Cummins, C.A., Hunt, M., Wong, V.K., Reuter, S., Holden, M.T.G., Fookes, M., Falush, D., Keane, J.A.,  
651 Parkhill, J. (2015) Roary: rapid large-scale prokaryote pan genome analysis. *Bioinformatics.* **31(22)**: 3691-3693.
- 652 Page, R., and Peti, W. (2016) Toxin-antitoxin systems in bacterial growth arrest and persistence. *Nature Chemical*  
653 *Biology.* **12**: 208–214.
- 654 Pandey, D.P., and Gerdes, K. Toxin–antitoxin loci are highly abundant in free-living but lost from host-associated  
655 prokaryotes. *Nucleic Acids Research.* **33(3)**: 966-976.
- 656 Redfield, R.J., Cameron A.D.S., Qian, Q., Hinds, J., Ali, T.R., Kroll, J.S., Langford, P.R. (2005) A novel CRP-dependent  
657 regulon controls expression of competence genes in *Haemophilus influenzae*. *Journal of Molecular Biology.* **4(8)**: 735-  
658 747.
- 659 Seemann, T. (2014) Prokka: rapid prokaryotic genome annotation. *Bioinformatics.* **30(14)**: 2068-2069.
- 660 Sinha, S., Cameron, A.D.S., and Redfield, R.J. (2009) Sxy induces a CRP-S regulon in *Escherichia coli*. *Journal of*  
661 *Bacteriology.* **191(16)**: 5180-5195.
- 662 Sinha, S., Mell, J.C., and Redfield, R.J. (2012) Seventeen Sxy-dependent cyclic AMP receptor protein site-regulated  
663 genes are needed for natural transformation in *Haemophilus influenzae*. *Journal of Bacteriology.* **194(19)**: 5245-5254.
- 664 Sinha, S., Mell, J.C., Redfield, R. (2013) The availability of purine nucleotides regulates natural competence by  
665 controlling translation of the competence activator Sxy. *Molecular Microbiology.* **88(6)**: 1106-1119.
- 666 Stamatakis, A. (2014) RAxML Version 8: A tool for phylogenetic analysis and post-analysis of large phylogenies.  
667 *Bioinformatics.* **30(9)**: 1312-1313.
- 668 Syed S.S., and Gilsdorf, J.R. (2007) Prevalence of *hicAB*, *lav*, *traA*, and *hifBC* among *Haemophilus influenzae* middle  
669 ear and throat strains. *FEMS Microbiology Letters.* **274(2)**: 180-183.
- 670 Tollervey, D. (2006) Molecular Biology: RNA lost in translation. *Nature.* **440**: 425-426.
- 671 Tracy, E., Ye, F., Baker, B.D., Munson, R.S., Jr. (2008) Construction of non-polar mutants in *Haemophilus influenzae*  
672 using FLP recombinase technology. *BMC Molecular Biology.* **9**: doi:10.1186/1471-2180-11-208.

- 673 Turnbull, K.J., and Gerdes, K. (2017) HicA toxin of *Escherichia coli* derepresses *hicAB* transcription to selectively  
 674 produce HicB antitoxin. *Molecular Microbiology*. **104**(5): 781-792.
- 675 Van Melderer, L., and Saavedra de Bast, M. (2009) Bacterial toxin-antitoxin Systems: more than selfish entities?  
 676 *PLOS Genetics*. **5**(3): e1000437.
- 677 Williams, P.M., Bannister, L.A., and Redfield, R.J. (1994) The *Haemophilus influenzae* *sxy-1* mutation is in a newly  
 678 identified gene essential for competence. *Journal of Bacteriology*. **176**(22): 6789-6794.
- 679 Yamaguchi, Y., Park, J-H., and Inouye, M. (2011) Toxin-antitoxin systems in bacteria and archaea. *Annual Review of*  
 680 *Genetics*. **45**: 61-79.

681

682 **FIGURE LEGENDS**

683 Figure 1: **Structure of wildtype and mutant *toxTA* genes.** Top line: structure of the wildtype *toxTA* operon in strain  
 684 KW20. Lower lines: light grey bars indicate segments deleted in  $\Delta toxT$ ,  $\Delta toxA$ , and  $\Delta toxTA$  mutants.

685

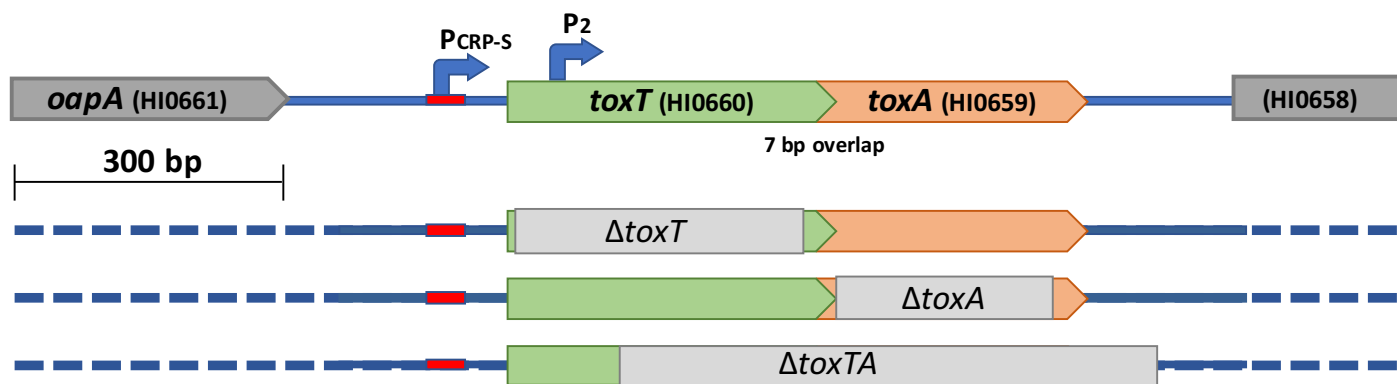

686

687

688 Figure 2: Transformation phenotypes of wildtype cells and *toxTA* mutants. Bars represent the means of at least  
689 three biological replicates, with error bars representing one standard deviation. Grey bars indicate values below the  
690 detection limit.

691

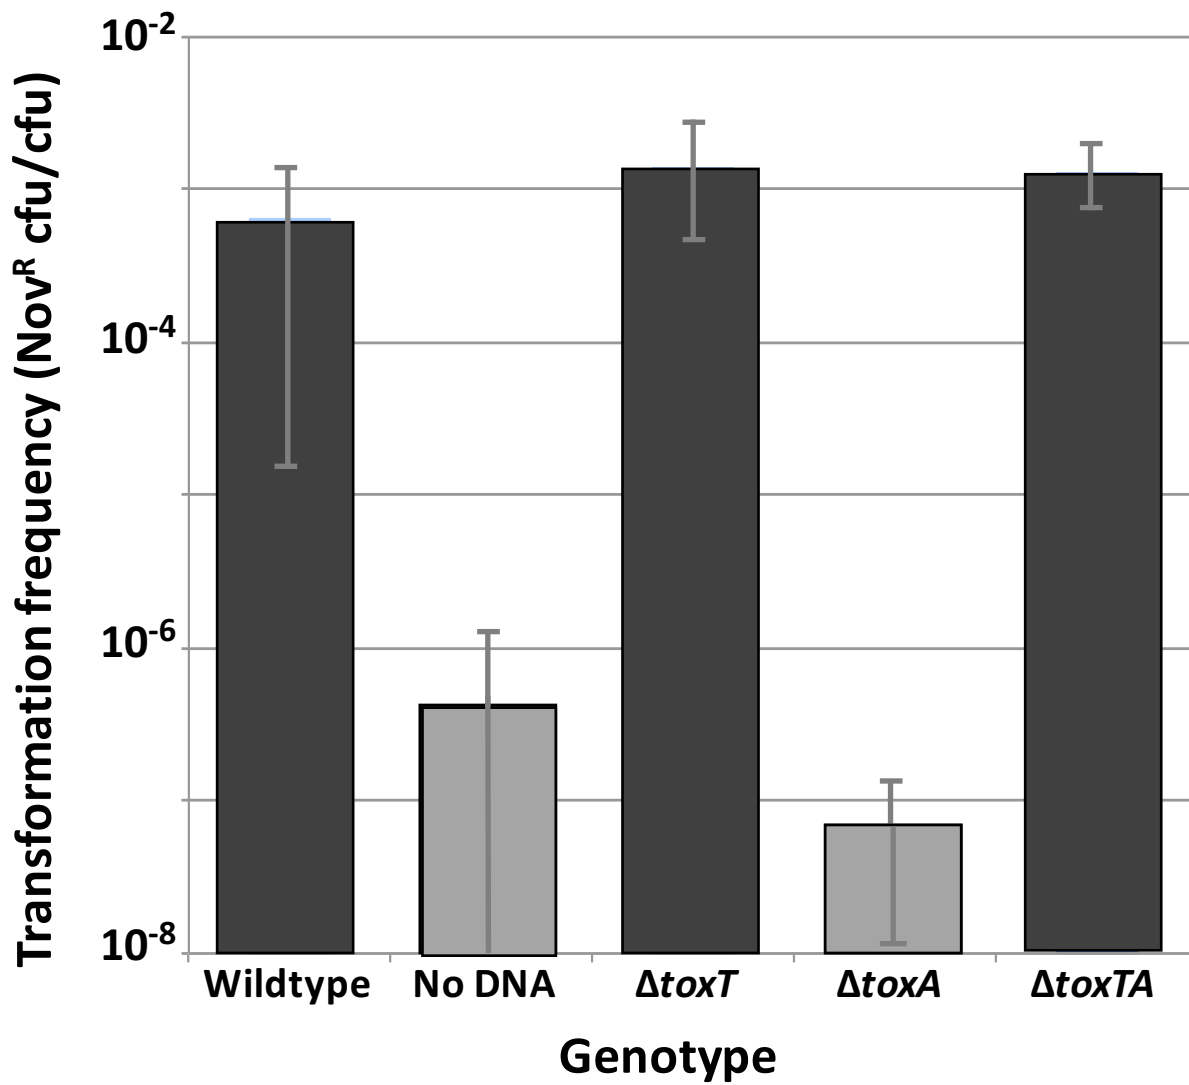

692

693

694

695 Figure 3: **Growth and MIV recovery of log-phase KW20 and  $\Delta$ toxA.** Log-phase cells in sBHI were transferred to MIV  
696 at t=65 min; a portion of each MIV culture was diluted 10-fold into sBHI at t=170 min. The grey-shaded area indicates  
697 samples taken from MIV cultures. Blue: KW20, orange:  $\Delta$ toxA.

698

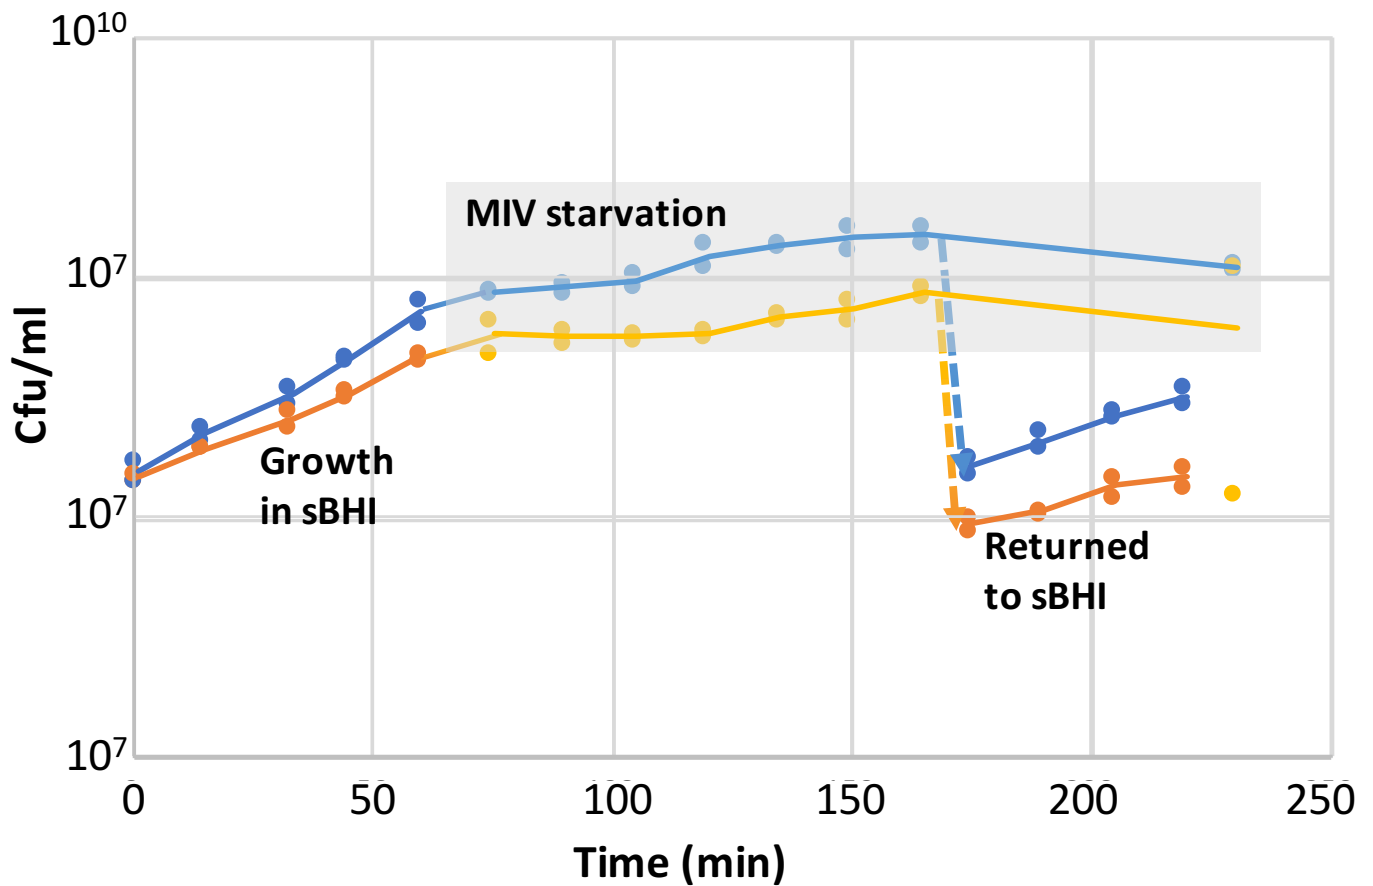

699

700

701

702

703 Figure 4: **Changes in expression of genes regulated by CRP and Sxy.** Each circle represents a gene, colour-coded by  
 704 function: red: *sxy*, green, CRP-N-regulated; blue, CRP-S-regulated; yellow, ribosomal; purple, purine synthesis;  
 705 orange, tryptophan synthesis; grey, other or unknown function. Each circle's horizontal position indicates the gene's  
 706 level of expression in rich medium (T=0) and its vertical position indicates how this expression changed at later time  
 707 points (**A**: T=10; **B**: T=30; **C**: T=100) or in a mutant background at T=30 (**D**;  $\Delta crp$ ; **E**:  $\Delta sxy$ ).

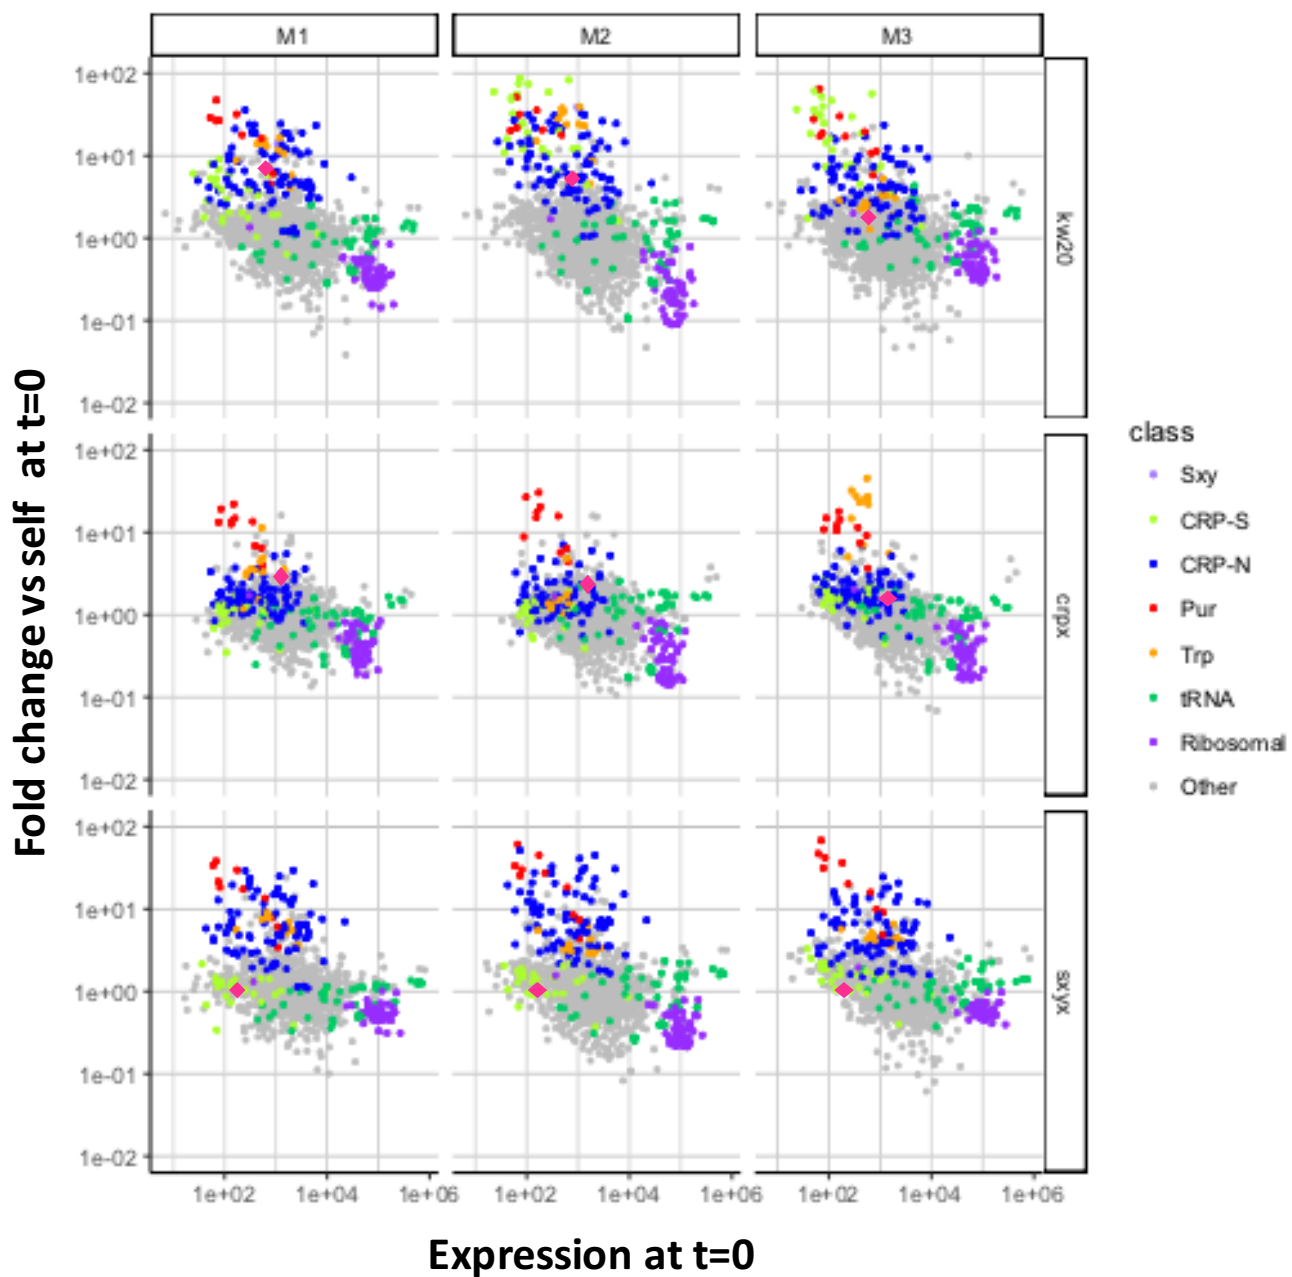

708

709

710

711 Figure 5: **Competence-induced expression of *toxT***. Sample FPKM values (dots) and means (lines) for *toxT* (HI0660).

712 Strains: wildtype: green;  $\Delta crp$ : brown;  $\Delta sxy$ : blue;  $\Delta toxA$ : red;  $\Delta toxT$ : grey;  $\Delta toxTA$ : black. The values for the  $\Delta toxT$  and

713  $\Delta toxTA$  samples are underestimates because most of the gene has been deleted in these strains.

714

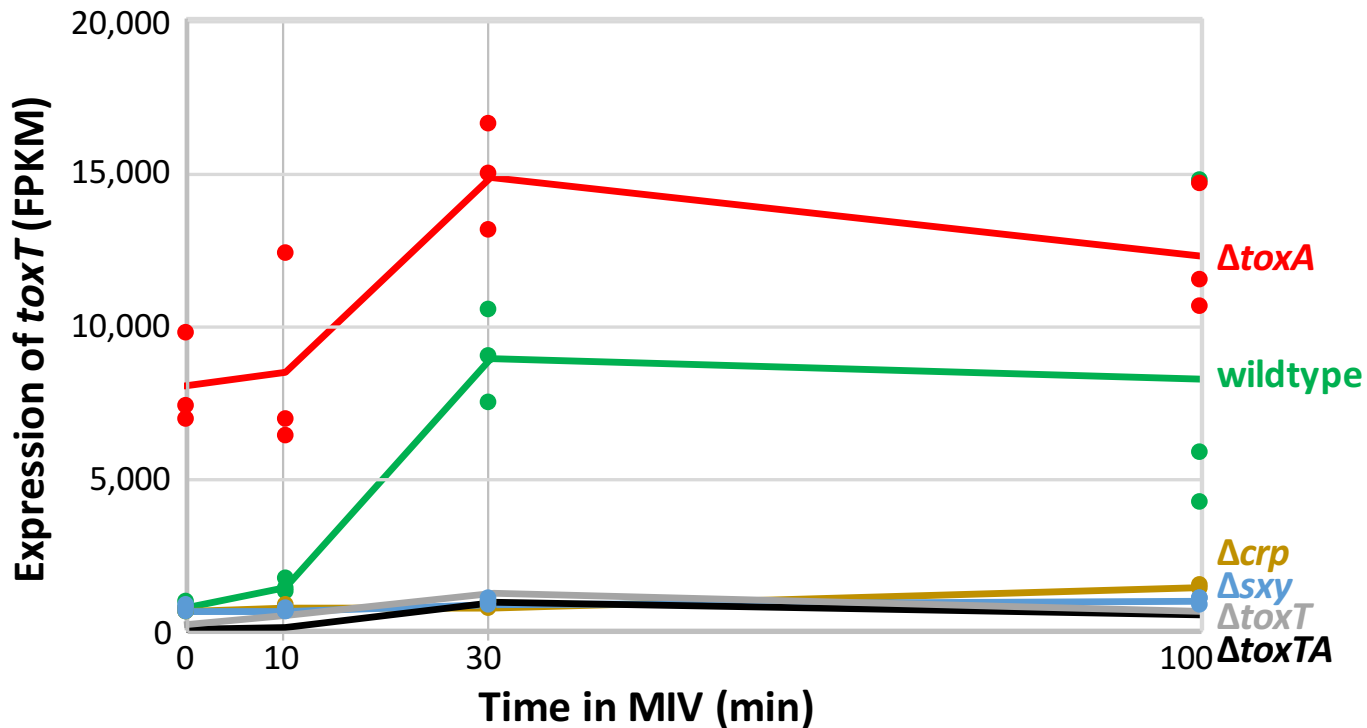

715

716



717 Figure 6: Read coverage of the *toxTA* promoter region. **A.** The green (KW20) and purple ( $\Delta$ *toxA*) lines indicate mean  
 718 normalized coverage at each position, shaded areas indicate standard errors. The yellow bar indicates the 5' half of  
 719 *toxT*. **B.** and **C.** Time course of normalized read coverage at two specific positions in the *toxTA* operon. **B.** Position 0 =  
 720 *toxA* start codon. **C.** Position 100.

721

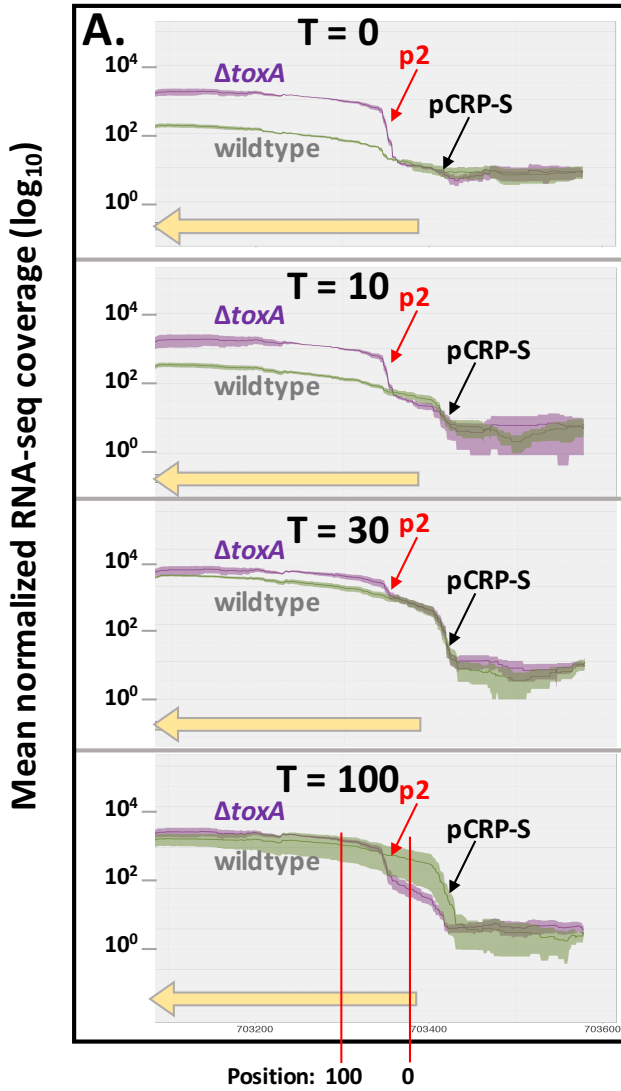

722

723

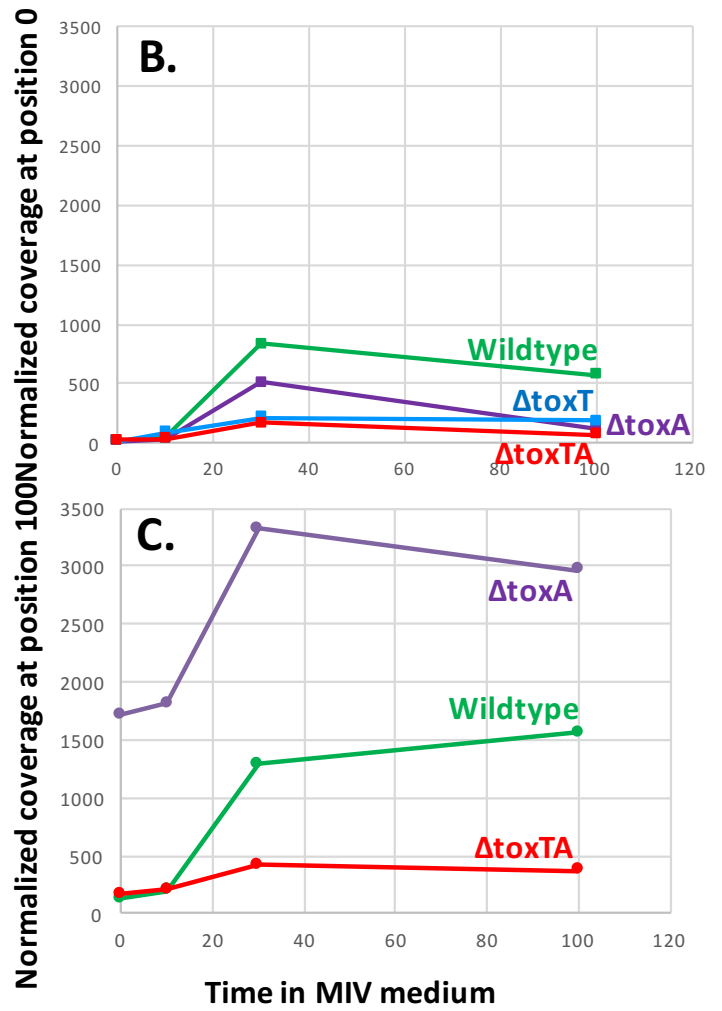

724 Figure 7: **Changes in competence operon expression levels after 30min in MIV.** Fold changes in competence operon  
725 expression levels in KW20 (green) and  $\Delta toxA$  (purple) after 30 min in MIV, compared to 0 minute samples. Black lines  
726 show standard errors.

727

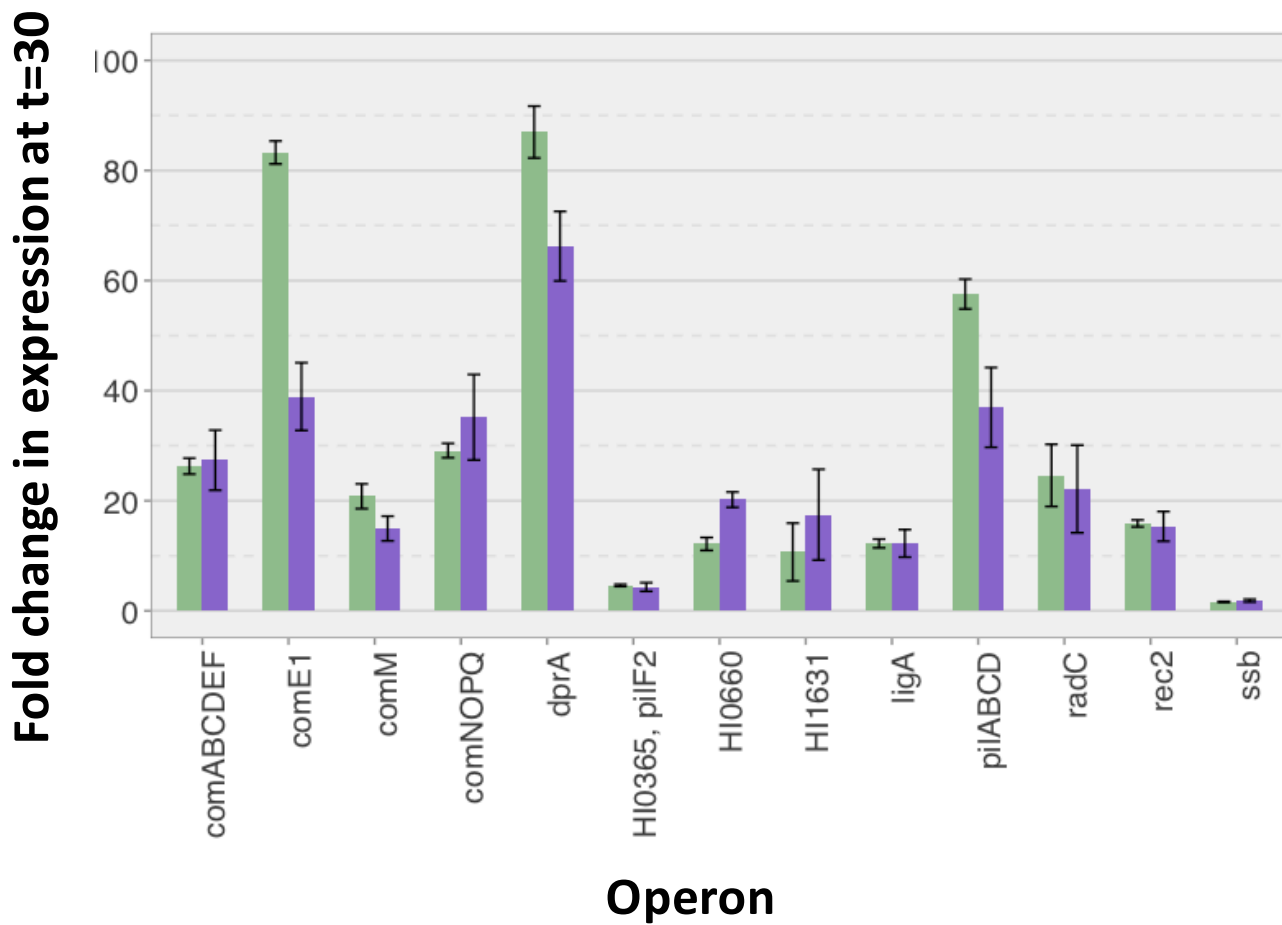

728

729

730 Figure 8: **Distribution of insert-size differences between RNA-seq libraries prepared at the same time.** Distribution  
731 of insert length differences between KW20 (kw20\_A and kw20\_B samples) and  $\Delta toxA$  (antx\_A samples) after 0, 10,  
732 30 and 100 minutes in MIV.

733

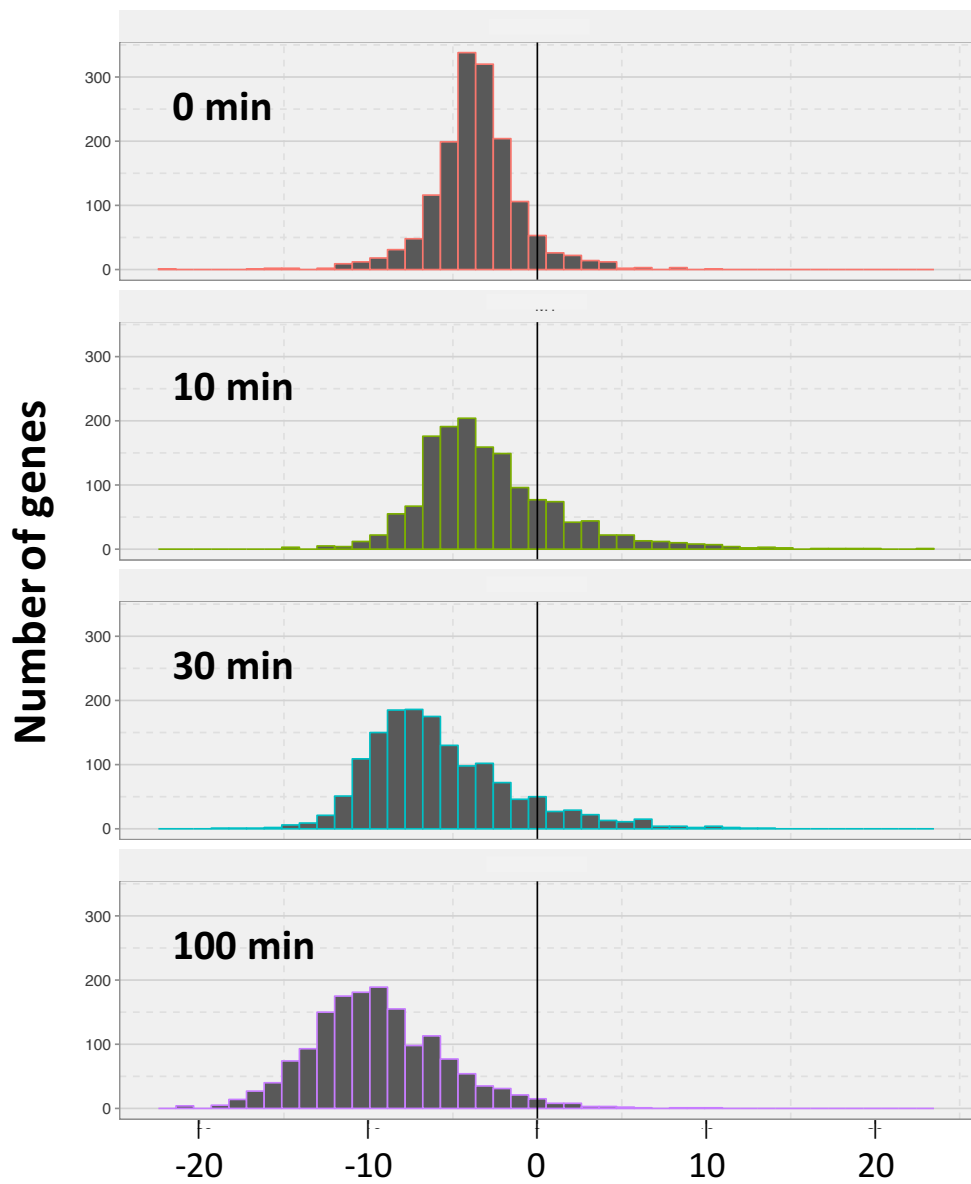

**Insert size difference between  $\Delta toxA$  and KW20 (bp)**

734

735

736

737 Figure 9: **Distribution of *toxTA* homologs in bacterial genomes.** **A.** Red dots indicate one or more taxa containing  
 738 homologs of both ToxT and ToxA. Bacterial phylogeny image from Wikimedia Commons (Letunic 2007). Inset:  
 739 Pasteurellacean phylogeny from Redfield *et al.* 2006. **B.** Unrooted maximum likelihood phylogeny of concatenated  
 740 *toxT* and *toxA* homologs from selected species where both are present. Numbers at nodes are bootstrap values.  
 741 Species abbreviations: *Apl*: *Actinobacillus pleuropneumoniae*; *Aeq*: *A. equuli*; *Asu*: *A. suis*; *Haemophilus haemolyticus*;  
 742 *Hin*: *H. influenzae*; *Ssa*: *Streptococcus salivarius*; *Ssu*: *S. suis*; *San*: *S. anginosus*; *Sco*: *S. constellatus*; *Sol*: *S.*  
 743 *oligofermentans*; *Spn*: *S. pneumoniae*; *Sth*: *S. thermophilus*.

**A.**

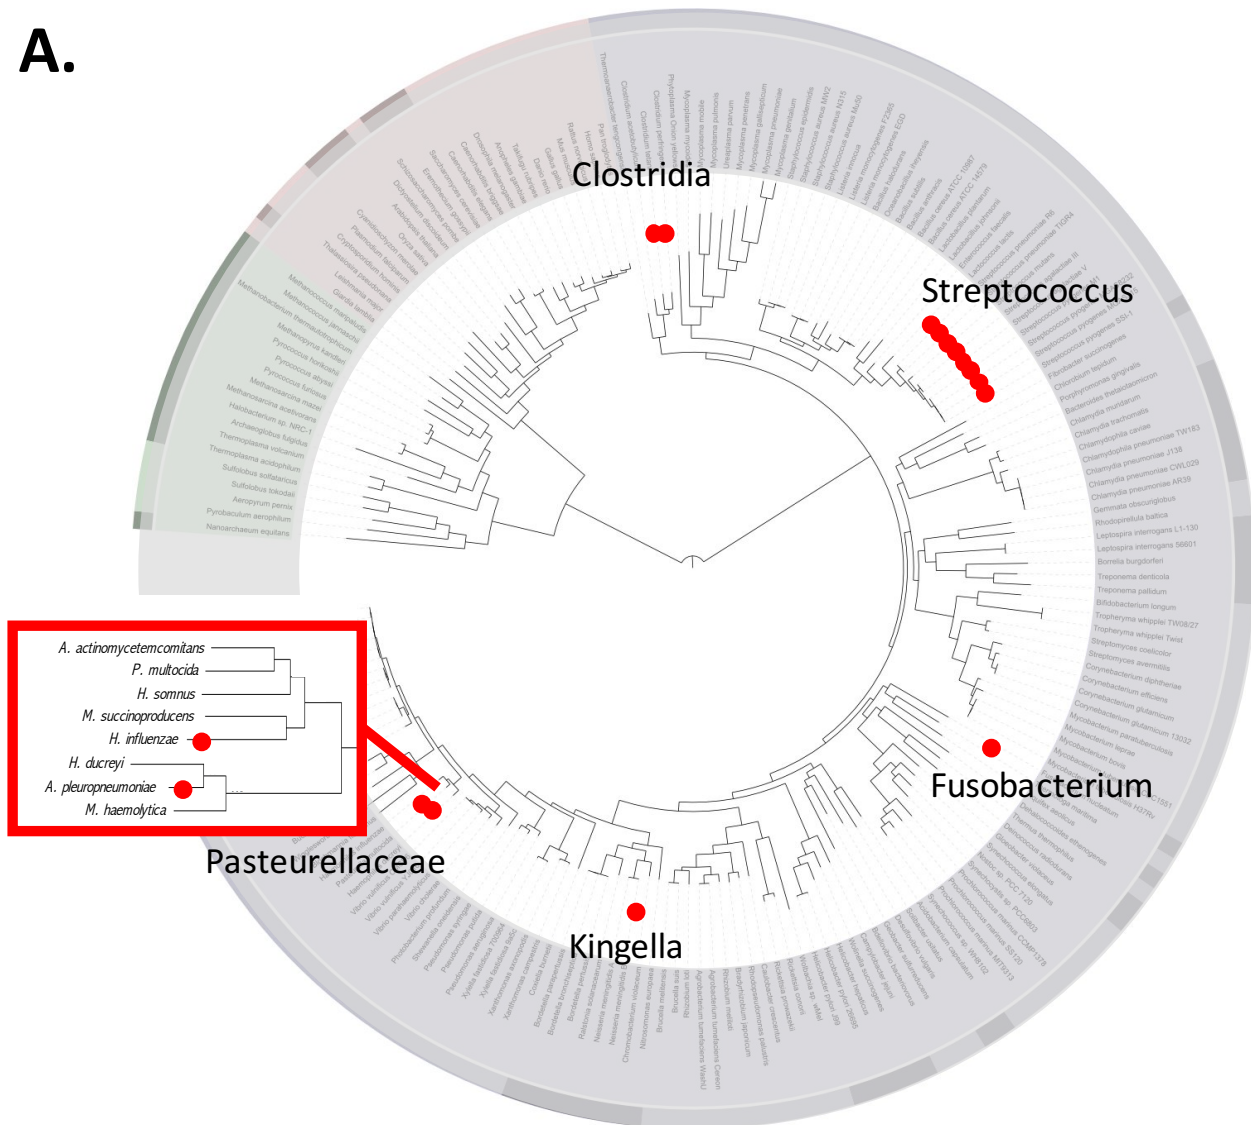

744

745

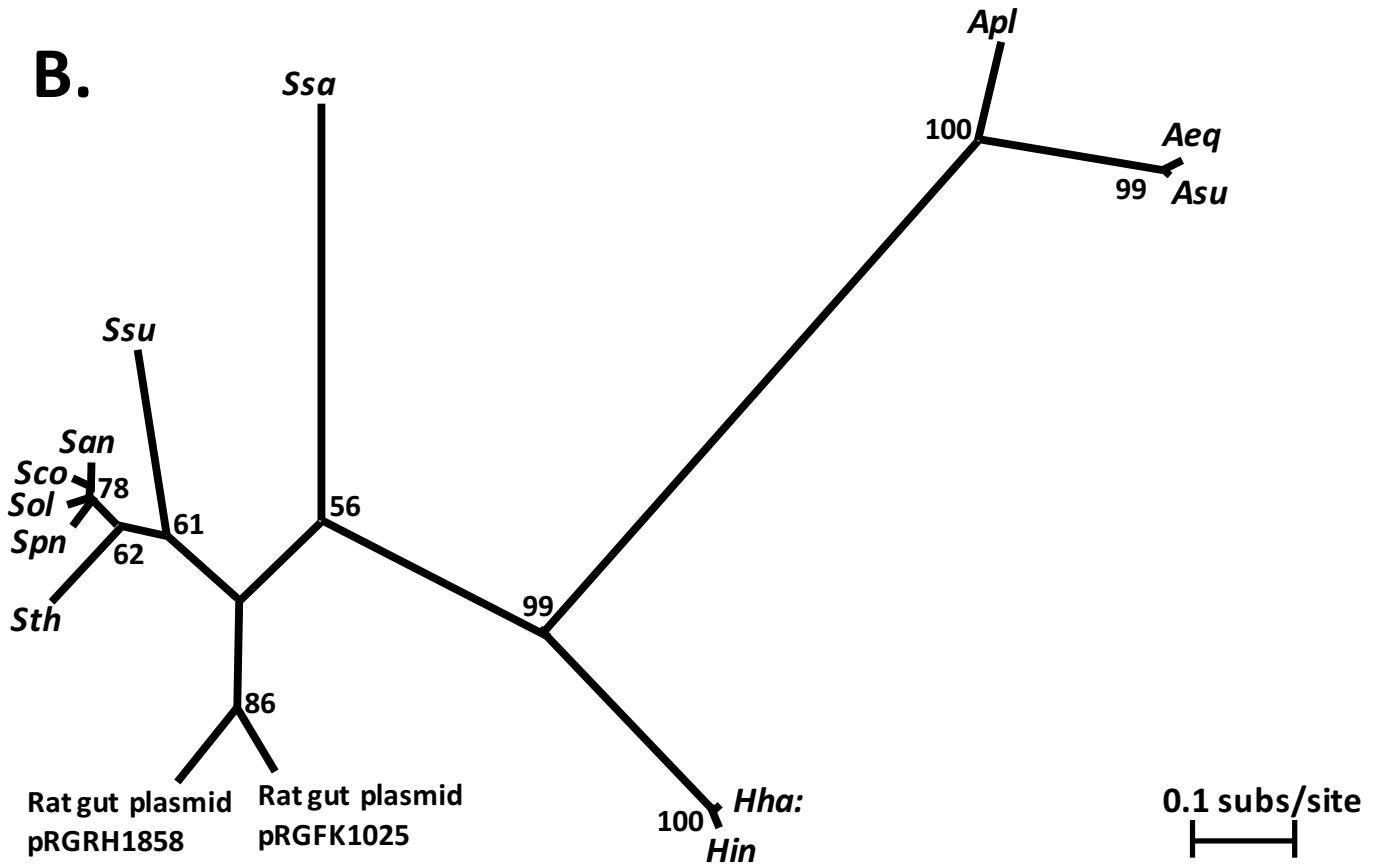

746

747

748 Figure 10: **Natural deletions in the *toxTA* operon.** Top line: structure of the wildtype *toxTA* operon in strain KW20.

749 Lower lines: dark grey bars indicate the spans of the three naturally occurring deletions, annotated with number of  
 750 strains possessing each deletion.

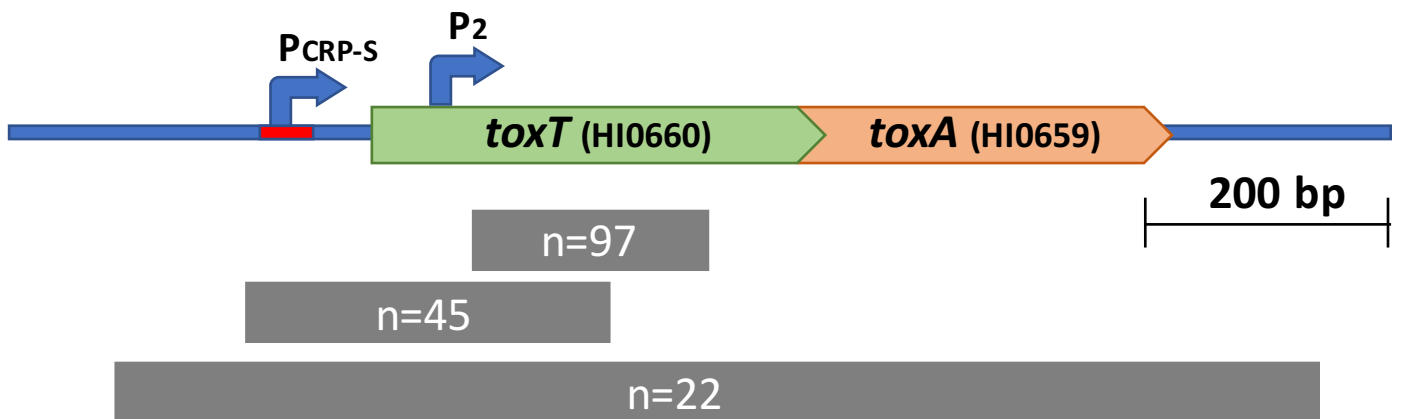

751
